**Title:**

Persistent cell motility requires transcriptional feedback of cytoskeletal – focal adhesion equilibrium by YAP/TAZ

**Authors:**

Devon E. Mason<sup>1,2,3</sup>, James H.awahare<sup>3</sup>, Trung Dung Nguyen<sup>3</sup>, Yang Lin<sup>4</sup>, Sherry L. Voytik-Harbin<sup>5,6</sup>, Pinar Zorlutuna<sup>3</sup>, Mervin E. Yoder<sup>4</sup>, Joel D. Boerckel<sup>1,2,3\*</sup>

**Affiliations:**

<sup>1</sup> McKay Orthopaedic Research Laboratory, Department of Orthopedic Surgery, University of Pennsylvania, Philadelphia, PA

<sup>2</sup> Department of Bioengineering, University of Pennsylvania, Philadelphia, PA

<sup>3</sup> Department of Aerospace and Mechanical Engineering, University of Notre Dame, Notre Dame, IN

<sup>4</sup> Herman B. Wells Center for Pediatric Research, Indiana University, Indianapolis, IN

<sup>5</sup> Weldon School of Biomedical Engineering, Purdue University, West Lafayette, IN

<sup>6</sup> Department of Basic Medical Sciences, Purdue University, West Lafayette, IN

**\*Corresponding Author:**

Joel D. Boerckel

email: boerckel@penncmedicine.upenn.edu

**Abstract**

Cell migration initiates by traction generation through reciprocal actomyosin tension and focal adhesion reinforcement, but continued motility requires adaptive cytoskeletal remodeling and adhesion release. Here, we asked whether *de novo* gene expression contributes to this cytoskeletal feedback. We found that global inhibition of transcription or translation does not impair initial cell polarization or migration initiation, but causes eventual migratory arrest through excessive cytoskeletal tension and over-maturation of focal adhesions, tethering cells to their matrix. The transcriptional co-activators YAP and TAZ mediate this feedback response, modulating cell mechanics by limiting cytoskeletal and focal adhesion maturation to enable persistent cell motility and 3D vasculogenesis. Motile arrest after YAP/TAZ ablation was rescued by depletion of the YAP/TAZ-dependent myosin phosphatase regulator, NUAK2, or by inhibition of Rho-ROCK-myosin II. Together, these data establish a transcriptional feedback axis necessary to maintain a responsive cytoskeletal equilibrium and enable neovascular function.

**Main Text**

**Introduction**

Embryonic morphogenesis and post-natal regeneration rely on individual and collective cell migration to produce heterogeneous, organized, and vascularized tissues. Each cell is equipped with cytoskeletal and adhesion machinery that enable motility in response to physical cues communicated at both cell-cell and cell-matrix interfaces. Cell migration is driven by actin

polymerization and actomyosin force generation, which coordinates focal adhesion formation, reinforcement, and disassembly<sup>1-3</sup>. These motile machinery form a molecular clutch, comprised of abundantly expressed proteins capable of producing intracellular tension, cellular polarization, and motility without *de novo* protein production, enabling rapid cellular responses to dynamic stimuli. However, the cytoskeletal activation that produces cell motility also induces mechanosensitive transcriptional programs. How new gene transcription regulates migration remains incompletely understood. Here, we sought to elucidate the role of transcriptional feedback in actomyosin control of cell migration.

Actomyosin tension is important for forward motility, but alone cannot not produce persistent migration, which requires coordinated actin treadmilling, leading-edge adhesion formation and trailing-edge disassembly<sup>4-6</sup>. Thus, negative feedback systems are inherent to the migratory machinery. For instance, myosin phosphatases (e.g., MLCP) modulate motor activity to tune cytoskeletal tension<sup>7-9</sup>, while focal adhesion kinase (FAK) regulates adhesion remodeling to prevent cellular anchorage<sup>10</sup>.

The paralogous transcriptional co-activators yes-associated protein (YAP) and transcriptional co-activator with PDZ-binding motif (TAZ, also known as WWTR1) have recently emerged as important mechanotransducers that couple biophysical cell-cell and cell-matrix cues to mechanotransductive gene expression<sup>11</sup>. YAP/TAZ activity is regulated by subcellular localization, and their nuclear accumulation is induced by tension of the actomyosin cytoskeleton<sup>11,12</sup>. These observations position YAP and TAZ as potential key mediators of cytoskeleton-induced transcriptional programs.

ECFCs are blood-circulating endothelial cells<sup>13</sup> that exhibit high proliferative and motile capacity and contribute to endothelium repair *in vivo*<sup>14,15</sup>. When cultured in three-dimensional matrices *in vitro* or transplanted *in vivo*, ECFCs can recapitulate vasculogenesis, characterized by cytoplasmic vacuolation, lumenization, and capillary plexus formation<sup>16,17</sup>. Here, we used ECFCs as a model system to demonstrate the importance of new gene transcription and translation for persistent cell migration and identify YAP and TAZ as mechanosensitive mediators of a transcriptional feedback loop that modulates cytoskeletal tension and focal adhesion formation. YAP and TAZ prevent myosin-dependent motile arrest by negatively regulating myosin light chain phosphorylation to enable persistent cell motility. Physiologically, we found that YAP and TAZ are essential for neovascular tube formation, vasculogenesis, and vascular sprouting.

## Results

### *Transcription is essential for migration and regulates stress fiber and focal adhesion maturation*

To evaluate directed cell motility driven by cell-cell and cell-matrix interactions in response to contact-inhibition release, we used the monolayer scratch assay on collagen-coated substrates to track migration over 8 hours (Figure 1a). To decouple existing cytoskeletal component function from *de novo* gene transcription/translation, we quantified longitudinal wound closure in the presence of vehicle (DMSO) or inhibitors that prevent mRNA transcription (actinomycin D; 0.1 or 0.25  $\mu\text{g}/\text{mL}$ ) or protein translation (puromycin; 1  $\mu\text{g}/\text{mL}$ ), applied 1 hour prior to migration initiation (Figure 1a). Wound closure (percentage and rate) was unaffected by either transcription or translation inhibition for the first 2 hours after contact inhibition release (Figure 1b). In vehicle-treated cells, wound closure rate reached a plateau, or migratory equilibrium, in approximately four hours; however, inhibition of either transcription or translation significantly slowed migration after four ( $p < 0.0005$ ) and eight hours post-initiation ( $p < .0001$ ). Low (0.1  $\mu\text{g}/\text{mL}$ ) and high (0.25  $\mu\text{g}/\text{mL}$ ) dose actinomycin D were equivalent, while translation inhibition produced the greatest degree of migratory arrest (Figure 1b).

One possible explanation for the delayed arrest of migration after transcription inhibition is that the cytoskeletal components of the molecular clutch become depleted over time. To test this, we evaluated actin polymerization and focal adhesion formation by immunofluorescence in leading-edge cells. Rather than observing depletion of actomyosin or focal adhesion proteins, transcription/translation inhibition significantly increased stress fiber formation (Figure 1c), actin polymerization (Figure 1d,e), and focal adhesion maturation (Figure 1f,g). Total actin was computed as the sum of F- and G-actin intensities on a per-cell basis (by phalloidin and DNaseI, respectively) and was unchanged by transcription or translation inhibition ( $p > 0.62$ ; Figure 1d). Rather, the fraction of actin in the filamentous state (i.e., F-actin) was significantly increased by both inhibitors (Figure 1e). Vinculin recruitment to focal adhesions was increased by transcription or translation inhibition, significantly increasing focal adhesion length (Figure 1g). Prolonged treatment with actinomycin D (24 hrs) caused the most pronounced changes in actin and focal adhesion morphology.

Thus, rather than depleting the migratory machinery, inhibition of new gene expression led to abundant cytoskeletal tension and increased focal adhesions. This suggests a transcriptional feedback mechanism that is responsible for modulating cytoskeletal tension and focal adhesion dynamics to enable persistent migration

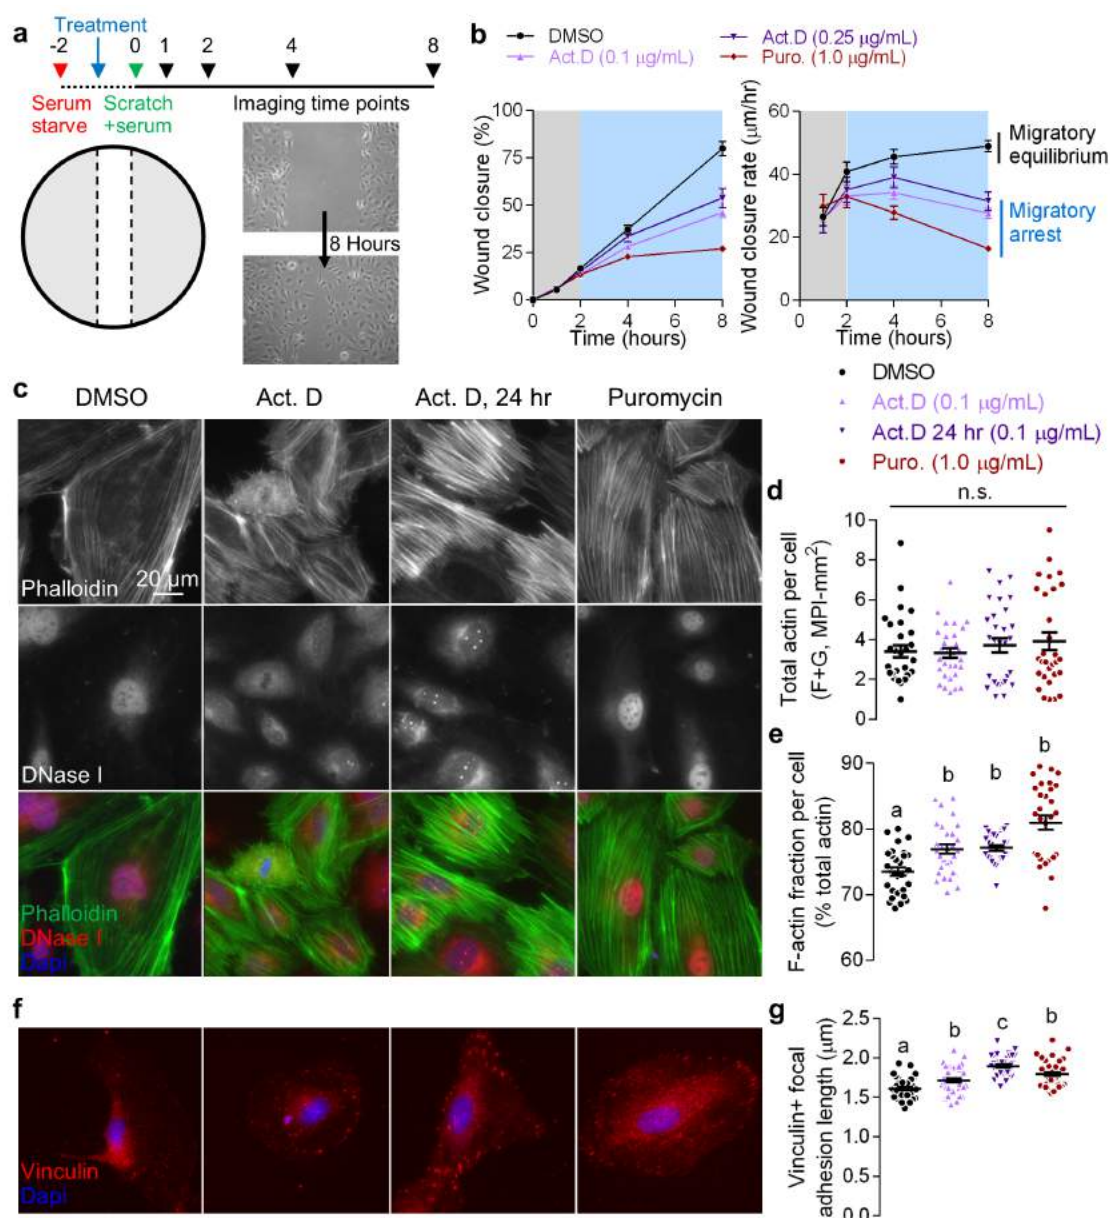

**Figure 1: *De novo* protein synthesis is essential for actin cytoskeleton and focal adhesion dynamics during migration.** ECFC migration after inhibition of *de novo* protein synthesis was assessed using the scratch assay followed by immunofluorescence. **a**, Confluent ECFCs were serum starved for 2 hours and actinomycin D or puromycin were added 1 hour into the serum starve. Monolayers were scratched to form an open “wound” over which to longitudinally quantify wound closure 0, 1, 2, 4, and 8 hours after the scratch. **b**, Wound closure % measured as (initial wound area – wound area at 8 hours / initial wound area) x 100% and wound closure rate, measured as the x-distance the cell front moved over the imaging time period ( $\mu\text{m/hr}$ ). Motility is initially transcription-independent and only requires existing cytoskeletal machinery (grey), followed by a transcription-dependent motile response at times greater than 2 hours (blue). N = 3 independent experiments,  $p < 0.025$ , Kruskal-Wallis with Dunn’s *post hoc* test. **c**, Representative images of F- and G-actin visualized by Alexa Fluor 488-conjugated phalloidin and Alexa Fluor 594-conjugated DNase I and nuclei visualized by DAPI. **d**, Total actin intensity (i.e., sum of phalloidin and DNase I fluorescent intensity). **e**, Percent filamentous actin, (i.e., phalloidin intensity / total actin intensity  $\times 100$ ). N = 3 independent experiments, n = 30 cells,  $p < 0.04$ , two-way ANOVA with Tukey’s *post hoc* test. **f**, Representative images of vinculin and nuclei visualized by Alexa Fluor 594-conjugated secondary and DAPI. **g**, Quantification of mature vinculin+ focal adhesion length. N = 2 independent experiments, n = 40 cells,  $p < 0.009$ , ANOVA with Tukey *post hoc* test. Summary statistics are represented as mean  $\pm$  s.e.m.

#### *YAP and TAZ are mechanosensitive in ECFCs*

Recent evidence has identified the transcriptional co-activators, YAP and TAZ, as cytoskeletal tension-activated regulators of gene expression<sup>11</sup>. Therefore, we hypothesized that YAP and TAZ mediate this transcriptional feedback. First, we confirmed that YAP and TAZ are mechanosensors of cytoskeletal tension in ECFCs using collagen-coated extracellular matrices of variable rigidity. Cells were seeded in sparse (1,250 cells/cm<sup>2</sup>) conditions on soft (1.85 kPa) or stiff (29 kPa) polyacrylamide (PA) or glass overnight followed by fixation and visualization of YAP and TAZ localization by immunocytochemistry (Extended Data Figure 1a). Consistent with prior reports in other cell types<sup>11</sup>, increased substrate rigidity significantly increased spread cell area and elongation (Extended Data Figure 1b,c) and increased nuclear localization of both YAP and TAZ (Extended Data Figure 1d).

#### *Dynamic control of YAP and TAZ promote migration and cytoskeletal pre-stress independent of angiocrine expression*

YAP/TAZ subcellular localization is regulated by cell-cell interactions through the Hippo pathway<sup>18</sup> and by cell-matrix interactions through cytoskeletal tension associated with cell spreading<sup>11,12</sup>. To track these interactions during cell migration, we quantified cell density and area as a function of position relative to the original wound edge, 10 hours after migration initiation (Figure 2a,b). Cell density remained constant in the cell monolayer at distances greater than 500  $\mu\text{m}$  behind the wound edge, but dropped exponentially ( $R^2 = 0.90$ ) to the leading edge (Figure 2a). Spread cell area similarly increased with an exponential fit ( $R^2 = 0.68$ ), but the effect of the wound on spread area extended only 200  $\mu\text{m}$  into the monolayer. Total (Figure 2c) and nuclear (Figure 2d) YAP and TAZ fluorescent intensity increased preferentially in migrating cells beyond the original wound edge (Figure 2c, d). The increase in total YAP/TAZ levels could be explained either by increased expression or by stabilization from proteasomal degradation<sup>18,19</sup>. However, YAP/TAZ mRNA expression was not increased after contact

inhibition release (Extended Data Figure 2a,b), suggesting that YAP and TAZ are stabilized from degradation in migrating cells.

To test the combinatorial roles of YAP/TAZ in cell motility, we depleted YAP and/or TAZ using RNAi, reducing protein expression to 27% and 18% of scrambled siRNA controls, respectively (Figure 2e; Extended Data Figure 2c,d). Control cells closed the 0.5mm-wide gaps within 12 hours, but YAP and/or TAZ depletion significantly impaired wound closure, with TAZ and YAP/TAZ depletion nearly abrogating migration (Figure 2f,g). YAP/TAZ depletion significantly reduced mRNA expression of secreted growth factors and enzymes including CTGF, Cyr61, and SerpinE1 (Extended Data Figure 2f,g). This suggested that YAP/TAZ activation could stimulate cell migration by induction of secreted angiocrines. However, recombinant reconstitution of these proteins failed to rescue cell motility (Extended Data Figure 2h,i) and transposition of conditioned medium from either control or YAP/TAZ-depleted cells (Figure 2h) similarly had no effect on either control or YAP/TAZ-depleted cell motility ( $p = 0.99$ ; Figure 2i), suggesting a cell-intrinsic mechanism.

Intracellular mechanics dynamically respond to extracellular stimuli like contact inhibition release during migration<sup>20-22</sup> and drive YAP/TAZ nuclear localization<sup>11</sup>. Cytoskeletal tension can be measured by the cellular resistance to deformation<sup>20</sup>. Therefore, we measured apical cell modulus as a function of migratory distance by single-cell nanoindentation (Figure 2j). In control cells, apical cell modulus was elevated at the leading edge of the migrating front (Figure 2j), consistent with tension-induced YAP/TAZ activation (cf. Figure 2d). YAP/TAZ-depleted cells exhibited reduced migration as above, but exhibited significantly elevated cell modulus compared to controls, both in the monolayer ( $p = 0.005$ ) and at the leading edge ( $p = 0.001$ ; Figure 2j).



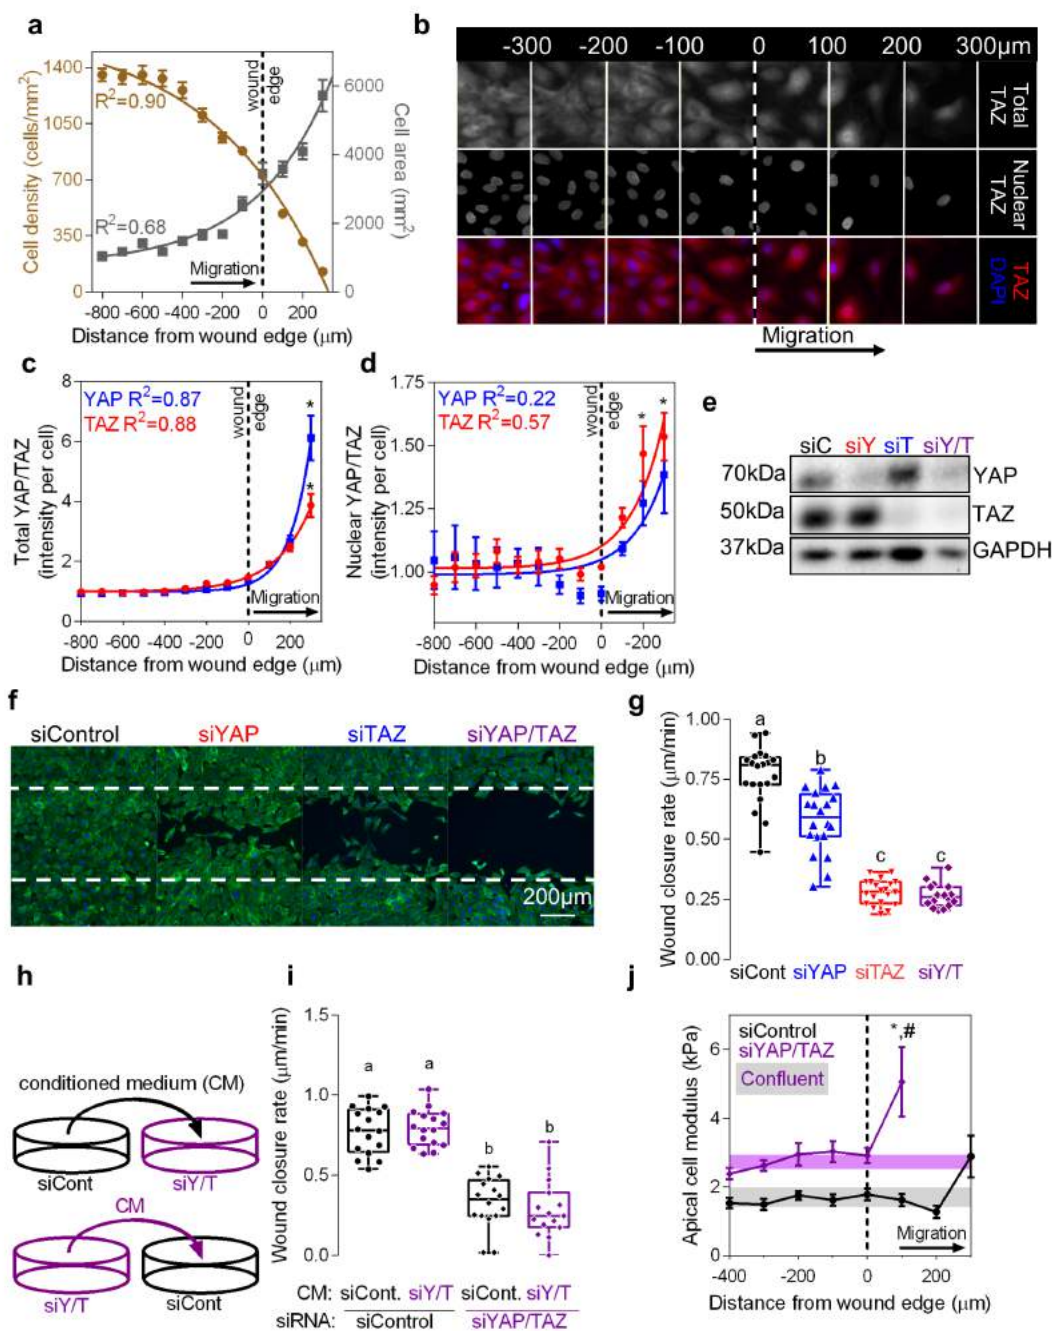

**Figure 2: YAP and TAZ are essential for ECFC motility by limiting cytoskeletal pre-stress.** Confluent ECFCs were scratched and imaged over 12 hours and fixed for immunofluorescence. **a**, Average cell density ( $y = -1863e^{-.00177x} + 1643$ ) and area ( $y = 7062 - 6287(1 - e^{-.00267x})$ ) as a function of distance from the leading edge (dotted lines) in 100 μm ROI's (solid lines). **b**, Representative immunofluorescent images of TAZ localization visualized by Alexa Fluor 594-conjugated secondary and DAPI subdivided into 100 μm ROI's. **c**, Normalized total YAP ( $y = .255e^{-.00996x} + 1$ ) and TAZ ( $y = .486e^{-.00582x} + 1$ ) fluorescent intensity in 100 μm ROI's. **d**, Normalized nuclear YAP ( $y = .033e^{-.00839x} + 1$ ) and TAZ ( $y = .120e^{-.00529x} + 1$ ) fluorescent intensity in 100 μm ROI's. Quantification of immunofluorescent images was performed on N = 2 separate experiments, n = 7 images per ROI, \* p < 0.0001 indicated ROI's vs all others, two-way ANOVA with Tukey *post hoc* test. **e**,

Representative western blot of YAP and TAZ depletion in ECFCs treated with siRNA targeting YAP and/or TAZ (Extended Data Figure 2a,b). **f**, Representative immunofluorescent images of ECFC migration after YAP and/or TAZ depletion, actin was visualized using Alexa Fluor 488-conjugated phalloidin. **g**, ECFC wound closure rate was calculated as the (initial wound area – wound area at 12 hours / initial wound area) x initial wound width. N = 3 independent experiments,  $p < 0.0001$ , ANOVA with Tukey *post hoc* test. **h**, Conditioned media from siControl or siYAP/TAZ samples were transferred to adjacent samples containing siControl or siYAP/TAZ cells used for wound closure experiments. **i**, Wound closure after conditioned media treatment. N = 2 independent experiments,  $p < 0.0001$ , ANOVA with Tukey *post hoc* test. **j**, Apical cell modulus measured by nanoindentation in 100  $\mu\text{m}$  ROI's. Percent filamentous actin, (i.e., phalloidin intensity / total actin intensity  $\times 100$ ). N = 2 and N = 3 independent experiments for siControl and siYAP/TAZ,  $n = 10-32$  cells per ROI, \*  $p < 0.023$  vs control leading edge, #  $p < 0.001$  vs siYAP/TAZ monolayer, two-way ANOVA with Tukey *post hoc* test. Summary statistics in **a**, **c**, **d**, and **j** are represented as mean  $\pm$  s.e.m.

### *YAP and TAZ promote ECFC migration speed and directional persistence*

Next, by live cell imaging, we evaluated YAP/TAZ function in the motility of single cells during collective and individual cell migration (Figure 3; Extended Data Videos 1-3). Control cells exhibited persistent, directional collective migration, whereas YAP/TAZ-depleted cells remained tethered in place, with many cells exhibiting small displacement between imaging intervals (15 min) but without persistent motion beyond the original cell borders (Figure 3a). Instantaneous cell migration speed was evaluated on a single-cell basis both for cells at the leading edge and in trailing cells, whose motility depends on contact inhibition release by motion of the leading cells. Control cell migration speed (in both leading and trailing cells) peaked 15 minutes after wounding, and decreased to a minimum after 2 hrs (Figure 3b) before re-accelerating until experiment completion at 10 hrs. In contrast, YAP/TAZ-depleted cell migration speed was initially lower and then decreased continuously until hour 10. Average migration speed was equivalent in leading and trailing cells in both control and YAP/TAZ-depleted conditions; however, YAP/TAZ-depletion significantly slowed migration regardless of position (Figure 3c).

Wound repair and directed angiogenesis *in vivo* require not only cell movement, but directional migration<sup>23</sup>. We therefore quantified the instantaneous directionality of individual cells both at the leading edge and in the trailing monolayer. Directionality was defined for each 15 minute time interval as the angle,  $\phi(t_n - t_{n-1})$ , relative to the wound edge, between an individual cell position at time  $t_n$  and its prior position at time  $t_{n-1}$  (Figure 3d). Leading edge control cells initiated forward migration, while trailing cells lagged by 2 hours, coinciding with the inflection in migration speed (cf. Figure 3b) and the motile arrest after transcription inhibition (cf. Figure 1b). In contrast, YAP/TAZ-depleted cells exhibited zero average directionality (Figure 3e) and had reduced persistence ( $p < 0.0001$ ), defined as the ratio of net migration distance to total distance traveled (Figure 3f).

We next asked whether the motility of individual YAP/TAZ-depleted cells could be restored by contact with control cells. YAP/TAZ-depleted cells were plated sparsely in a more than 100-fold excess of control cells and random migration within the mixed monolayer was tracked over time in 2D space (Figure 3g). YAP/TAZ-depletion significantly reduced individual cell motility by 43-47%, measured by mean square displacement (Figure 3h) and decreased net displacement (Figure 3i) compared to control cells in the same mixed monolayer. These data further support a cell-autonomous role of YAP and TAZ in cell migration.

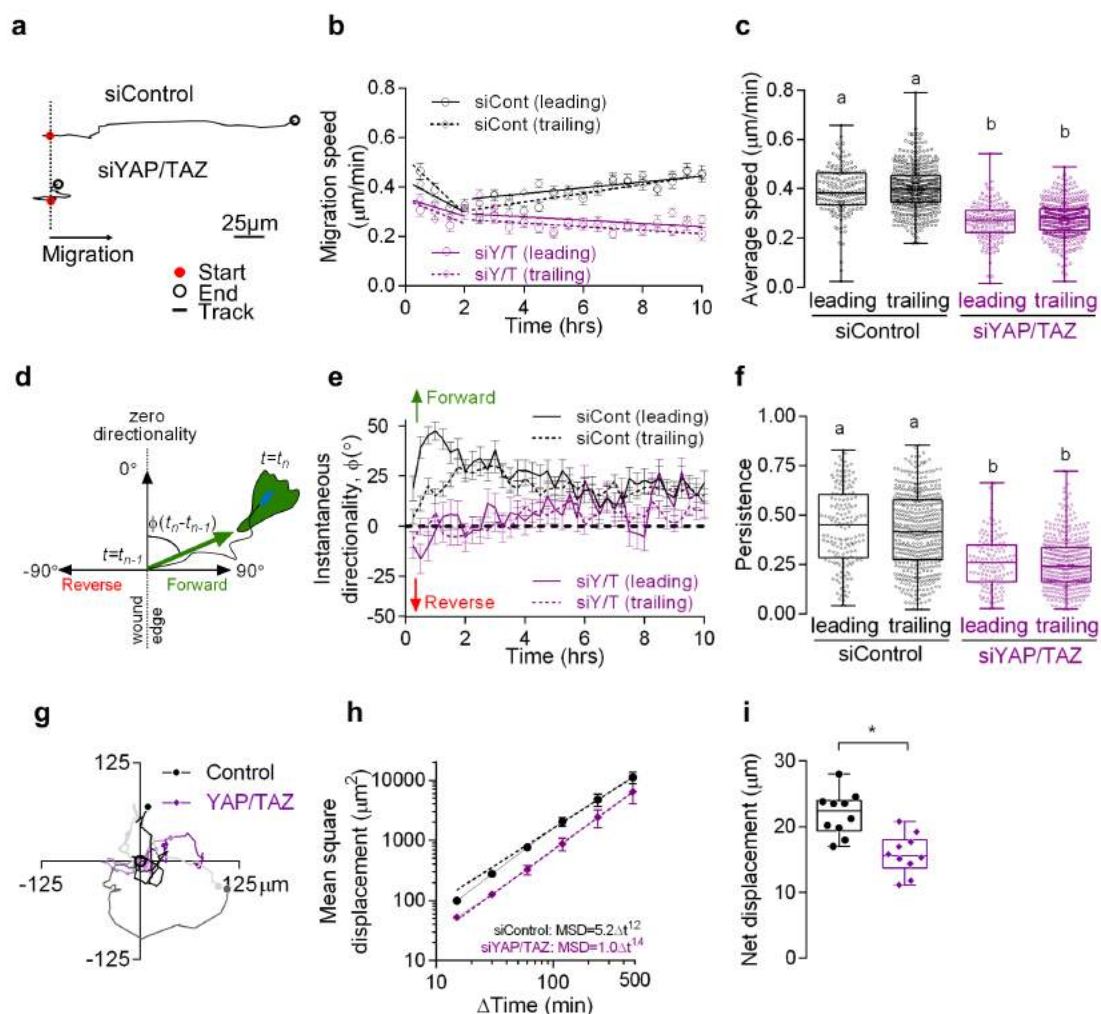

**Figure 3: YAP and TAZ temporally and spatial control individual and collective cell motility.** ECFCs expressing EGFP (siControl) or mTomato (siYAP/TAZ) were plated in wells of a custom PDMS stencil and imaged at 15-minute intervals over 10 hours to track individual cell migration. **a**, Representative cell migration tracks over 10 hours (dashed line indicates starting position). **b**, Cells were grouped into leading ( $< 100 \mu\text{m}$  from the front most cell) and trailing ( $100\text{-}500 \mu\text{m}$  from the front most cell) based on their initial position. Instantaneous average cell migration speed (30-minute intervals shown) as a function of time.  $N = 5$  separate imaging regions per condition,  $n = 140\text{-}165$  leading cells and  $n = 437\text{-}484$  trailing cells. **c**, Per cell average migration speed, averaged over 10 hours.  $p < 0.0001$ , ANOVA with Tukey *post hoc* test. **d**, Instantaneous cell directionality defined as the direction ( $\phi(t_n - t_{n-1})$ ) a cell moved between the current position ( $t_n$ ) and the previous position ( $t_{n-1}$ ) relative to the wound edge. **e**, Instantaneous cell directionality in leading and trailing cells, each data point is the average of all the cells in that group. Data points above  $0^\circ$  indicate cells in that group tend to move into the wound edge whereas those below tend to move in the direction opposite the wound edge. **f**, Single cell motile persistence, quantified as end-to-end displacement divided by total displacement.  $p < 0.0001$ , ANOVA with Tukey *post hoc* test. **g**, EGFP (siControl) or mTomato (siYAP/TAZ) cells were plated with a 100-fold excess of the opposite condition and random cell migration was tracked. Representative random migration tracks for siControl (black-grey lines) and siYAP/TAZ (purple-pink lines) cells. **h**, Mean square displacement of randomly migrating siControl ( $R^2 = .57$ ) and siYAP/TAZ ( $R^2 = .35$ ) cells. **i**, Average net displacement of



randomly migrating cells over 10 hours.  $n = 10$  cells,  $p < 0.0004$ , two-tailed Student's unpaired t-test. Summary statistics in **b**, **e**, and **h** are mean  $\pm$  s.e.m.

### *YAP and TAZ are dispensable for microtubule polarization and golgi reorientation*

Cell migration initiates by establishment of front-rear cell polarity, determining motile direction<sup>4</sup>. This cellular polarization requires microtubule-mediated polarization of the microtubule orienting center (MTOC) to coordinate microtubule extension and cytoskeletal remodeling, and is accompanied by polarization of the golgi apparatus<sup>24</sup>. To determine whether YAP and TAZ regulate migratory cell polarity, we evaluated microtubule network structure and golgi polarization, defined as orientation of the golgi apparatus within  $\pm 60^\circ$  of the direction of the wound (Figure 4a). We found that both control and YAP/TAZ-depleted cells had similar microtubule networks that extended from the MTOC to the cell periphery (Extended Data Figure 3a), and YAP/TAZ depletion had no effect on golgi polarization in leading edge cells (Figure 4b). In cells at the migratory front, 60% of cell golgi polarized in each condition, significantly greater than the random (33%) distribution observed in non-wounded monolayers ( $p < 0.0001$ ; Extended Data Figure 3b). In the trailing region (Figure 4c), control cells also exhibited significant golgi polarization ( $p = 0.002$  vs random), but YAP/TAZ-depleted trailing cells did not ( $p = 0.81$ ; Extended Data Figure 3b). These data suggest that YAP/TAZ are dispensable for early direction sensing and the initiation of motile polarization, but are required for directional persistence.

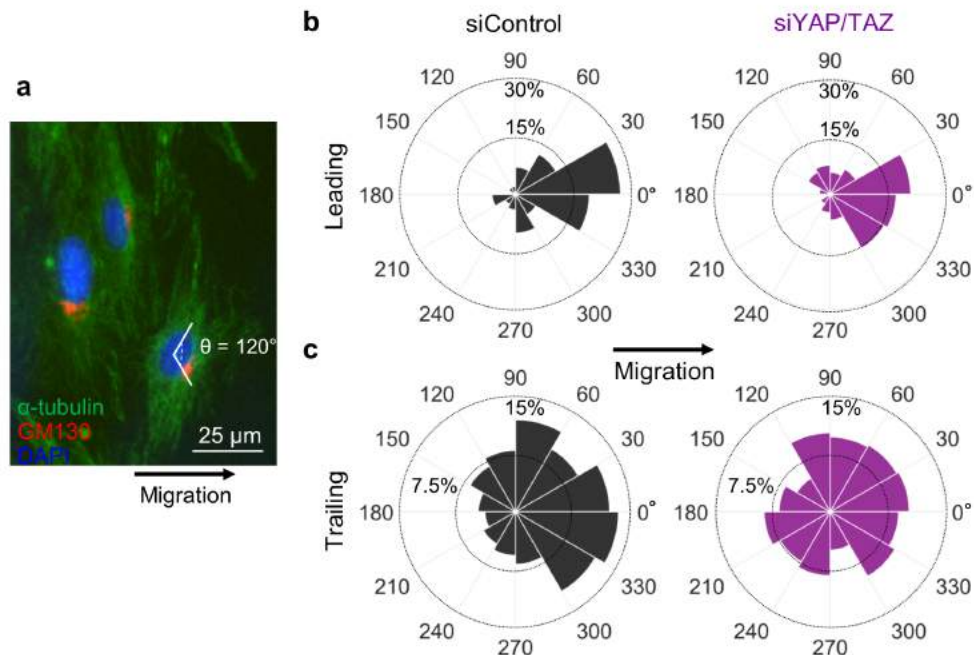

**Figure 4: YAP and TAZ are dispensable for microtubule polarization.** ECFCs were fixed 8 hours after the initiation of migration and immunofluorescence used to visualize microtubule polarization. **a**, Representative image of microtubules ( $\alpha$ -tubulin) and golgi (GM130) visualized with Alexa Fluor 488- and 594-conjugated secondary, respectively. Golgi were considered polarized when within a  $120^\circ$  region centered about a vector extending horizontally from the nuclei (DAPI) in the direction of the wound edge. **b,c**, Rose plot of golgi polarization in siControl (black) and siYAP/TAZ (purple) and leading (**b**) and trailing (**c**) cells, where cells with golgi closer to  $0^\circ$  are considered polarized in the direction of the leading edge. Leading cells were within  $50 \mu\text{m}$  of the front most cell nuclei.  $N = 3$  independent

experiments,  $n = 64-65$  leading cells,  $n = 143-165$  trailing cells. Additional quantification can be found in Extended Data Figure 3b.

### *YAP and TAZ regulate cytoskeletal and focal adhesion remodeling*

We found above that transcription inhibition caused migratory arrest and increased cytoskeletal polymerization and focal adhesion formation. Similarly, YAP/TAZ depletion impaired persistent migration with increased cellular pre-stress. We therefore hypothesized that YAP and TAZ transcriptionally regulate actin cytoskeletal architecture to enable persistent motility.

Consistent with this hypothesis, YAP and/or TAZ depletion from migrating cells significantly increased F-actin intensity and produced larger stress fibers (Figure 5a,b) and fewer ruffled borders compared to controls (Figure 5a,c). While the total actin per cell (F+G) remained constant across conditions ( $p > 0.41$ ; Figure 5d), YAP and/or TAZ depletion significantly increased F-actin polymerization from G-actin (Figure 5e).

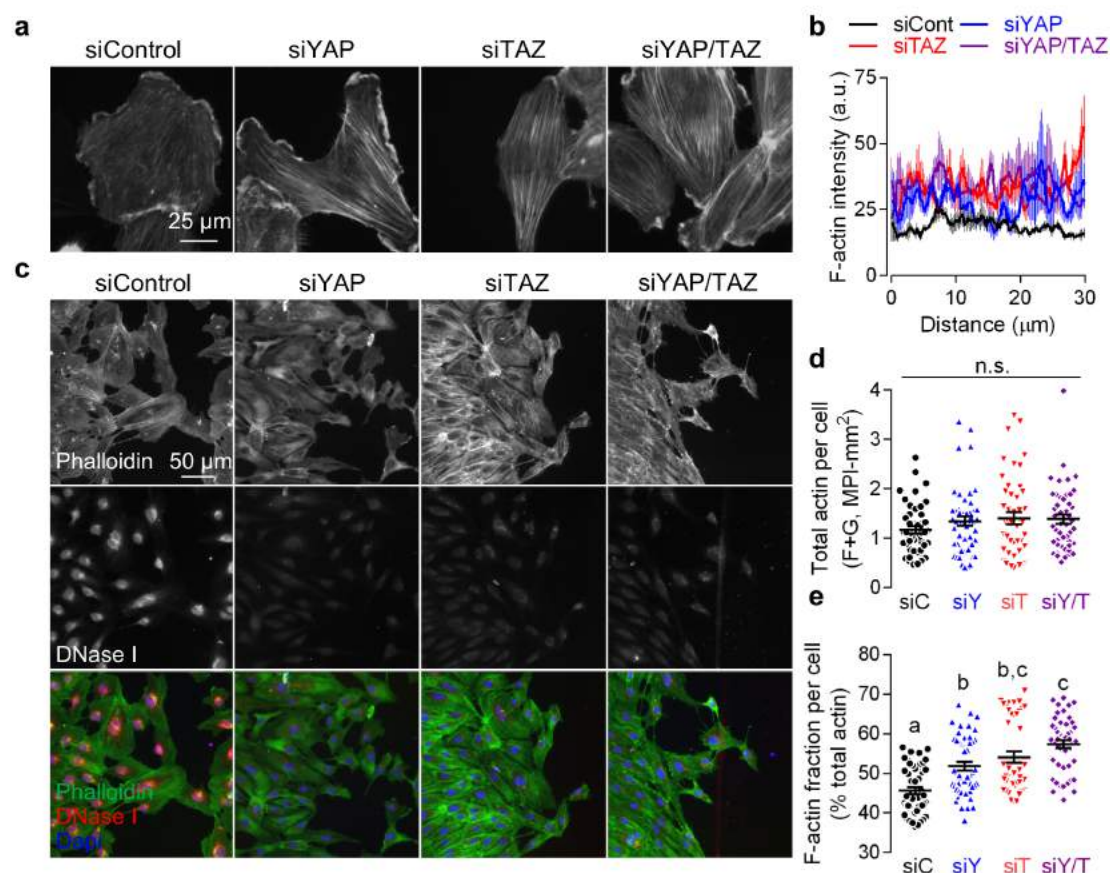

**Figure 5: YAP and TAZ modulate actin polymerization and stress fiber formation.** Migrating ECFCs were fixed 8-12 hours after the initiation of migration and actin was visualized using immunofluorescence. **a**, Immunofluorescent images of actin visualized with Alexa Fluor 488-conjugated phalloidin. **b**, Average fluorescent intensity line profiles of phalloidin, line plots are the average of three cells per condition. **c**, Representative images of F- and G-actin visualized by Alexa Fluor 488-conjugated phalloidin and Alexa Fluor 594-conjugated DNase I, respectively. **d**, Total actin intensity (i.e., sum of phalloidin and DNase I fluorescent intensity). **e**, Percent filamentous actin, (i.e., phalloidin intensity / total

actin intensity  $\times 100$ ).  $N = 3$  independent experiments,  $n > 45$  cells,  $p < 0.0001$ , ANOVA with Tukey *post hoc* test. Summary statistics represented as mean  $\pm$  s.e.m.

In typical conditions, focal adhesion number is tightly correlated to adherent cell area<sup>25</sup>, but we found that YAP/TAZ depletion significantly reduced cell spreading and increased cell elongation (Extended Data Figure 4a-c) and simultaneously increased the total number of focal adhesions ( $p < 0.0001$ ; Figure 6b, left), altering the relationship with spread-cell area (Figure 6b, right). YAP and/or TAZ depletion increased the number of focal adhesions regardless of size (Figure 6c), however, representation of this histogram as a cumulative distribution function ( $\Phi$ , Figure 6d), revealed distinct effects of YAP vs. TAZ. YAP depletion proportionally increased focal adhesion number regardless of length, while TAZ depletion shifted the distribution to larger focal adhesions (Figure 6d) resulting in increased average focal adhesion length (Extended Data Figure 4d). Focal adhesion tyrosine kinase (FAK), was present and phosphorylated at tyrosine 397 (pFAK) in focal adhesions found in both control and YAP/TAZ depleted cells, but was preferentially localized to the cell periphery in YAP/TAZ depleted cells (Extended Data Figure 5).

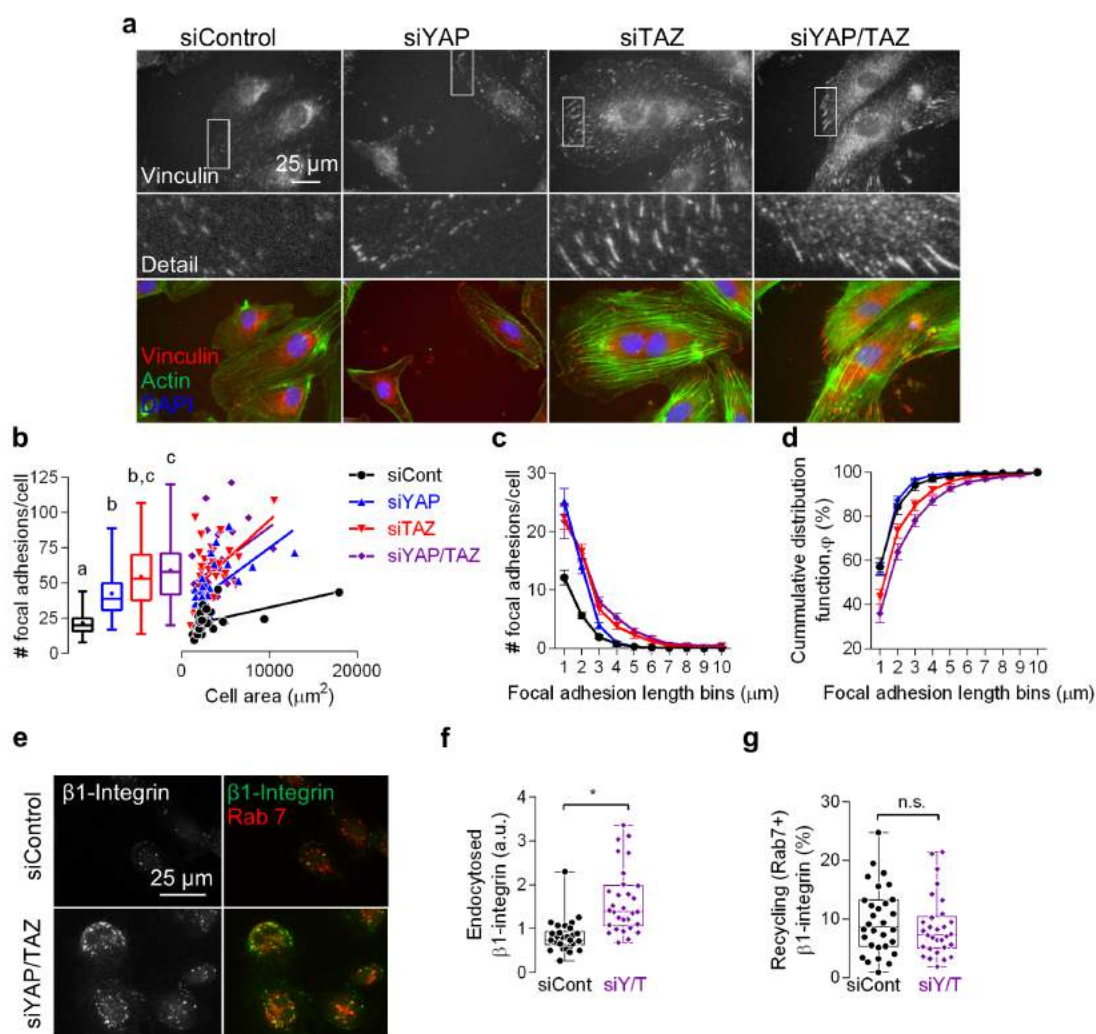

**Figure 6: YAP and TAZ modulate focal adhesion remodeling without affecting  $\beta$ 1-integrin recycling.** Confluent ECFCs were fixed for immunofluorescence 12 hours after the initiation of migration and vinculin visualized using immunofluorescence. **a**, Representative images of vinculin and actin visualized with Alexa Fluor 594-conjugated secondary and 488-conjugated phalloidin, respectively. **b**, Average number of peripheral focal adhesions per cell as a function of cell area.  $N = 3$  independent experiments,  $n > 30$  cells per condition,  $p < 0.004$ , ANOVA with Tukey *post hoc* test. **c**, Focal adhesion size histogram and **d**, cumulative distribution function, or the percentage of focal adhesions in a cell of a given size. **e**, Live ECFCs were incubated with mouse monoclonal antibodies targeting active  $\beta$ 1-integrin (10  $\mu$ g/mL) which was endocytosed for 45 minutes followed by acid wash and fixation and detected with Alexa Fluor 488-conjugated secondary. Rab 7+ endosomes were visualized with Alexa Fluor 594-conjugated secondary. **f**, Total fluorescent intensity of endocytosed  $\beta$ 1-integrin.  $N = 2$  independent experiments,  $n = 30$  cells/ condition,  $p < 0.0001$ , two-tailed Student's unpaired t-test. **g**, Fluorescent intensity of recycling endocytosed  $\beta$ 1-integrin co-localized with Rab 7+ endosomes.  $p > 0.46$ , two-tailed Student's unpaired t-test. Summary statistics in **c** and **d** are mean  $\pm$  s.e.m.

#### *YAP and TAZ regulate focal adhesion formation and maturation, but not disassembly*

Observation of live cell migration revealed persistent actin-focal adhesion connectivity at the cell trailing edge, resulting in protrusion of actin stress fibers beyond the trailing cell membrane, tethering the cell at the training edge (Extended Data Videos 4, 5). This led us to ask whether YAP/TAZ could regulate focal adhesion release or disassembly. To test this, we quantified internalization of the pro-angiogenic<sup>26</sup> integrin,  $\beta$ 1, using an active  $\beta$ 1-integrin antibody internalization assay and evaluated  $\beta$ 1 recycling by colocalization with Rab 7+ endosomes<sup>27</sup> (Figure 6e). If YAP/TAZ control focal adhesion disassembly, we would expect to observe impaired integrin endocytosis with YAP/TAZ depletion. However, we found that  $\beta$ 1-integrin endocytosis was significantly increased in YAP/TAZ depleted cells ( $p < 0.0001$ , Figure 6f), concomitant with increased focal adhesion number (cf. Figure 6a-d). Further, upon internalization, the amount of  $\beta$ 1-integrin recycling in rab7+ endosomes was constant ( $p = 0.69$ , Figure 6g), suggesting no defects in focal adhesion disassembly.

#### *YAP and TAZ limit cytoskeletal tension through MYL phosphorylation*

Cytoskeletal tension and aggregation of actin filaments into stress fibers is mediated by myosin motor force generation and crosslinking, which in turn stabilizes focal adhesions<sup>28</sup>. Therefore, we next asked whether YAP and TAZ regulate cytoskeletal remodeling through activation of non-muscle myosin II. We found that YAP/TAZ depletion increased serine 19 phosphorylation of myosin light chain (pMYL), which localized to stress fibers, consistent with mechanosensitive recruitment of myosin II to regions of high actin stress<sup>29,30</sup> (Figure 7a). YAP/TAZ depletion did not decrease the total amount of MYL ( $p = 0.15$ ), but significantly increased the amount and percentage of pMYL ( $p < 0.0001$ , Figure 7b,c).

To confirm a functional role for myosin in YAP/TAZ-dependent cytoskeletal dynamics and migration, we inhibited myosin II ADP cycling using Blebbistatin and myosin association with actin by inhibiting Rho-associated kinase (ROCK)-mediated phosphorylation of MYL, using Y-27632. Both myosin and ROCK inhibition in YAP/TAZ-depleted cells reduced stress fiber formation and focal adhesion maturation to levels observed in control cells (Figure 7d) and substantially rescued cell migration (Figure 7e).



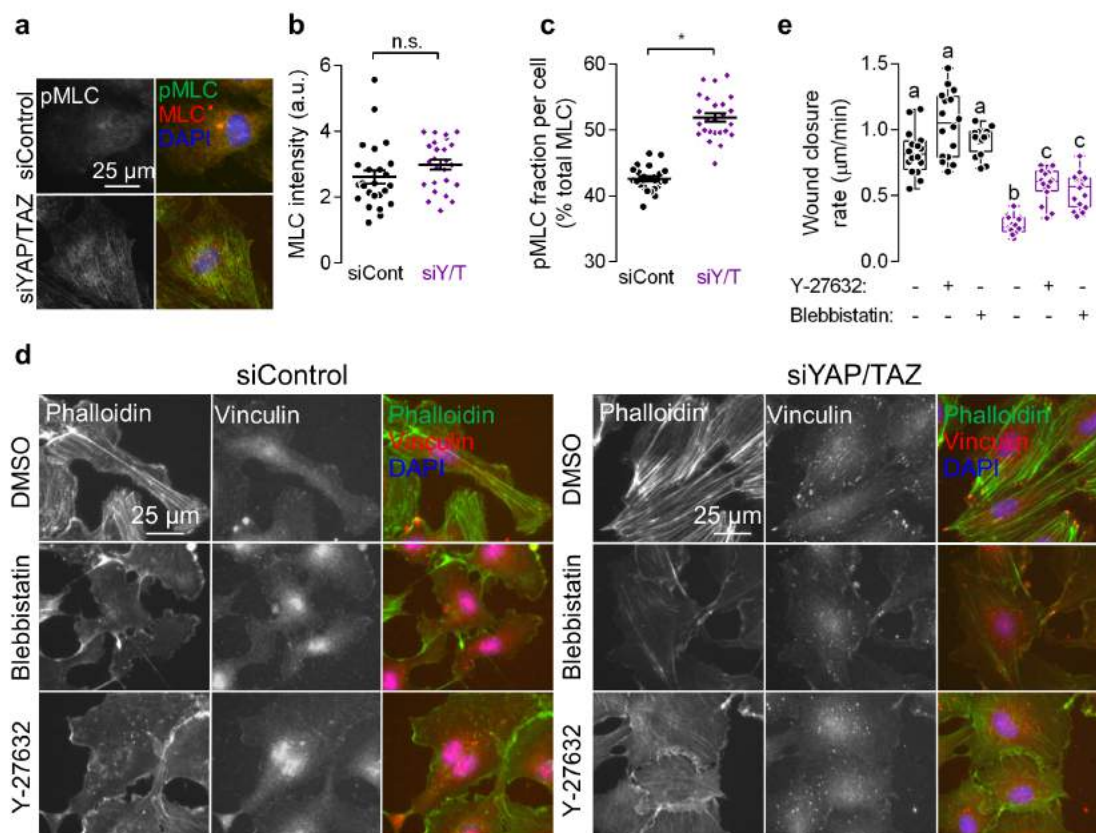

**Figure 7: YAP and TAZ promote migration by limiting myosin light chain phosphorylation.** Migrating ECFCs were fixed for immunofluorescence 12 hours after the initiation of migration. treated with ROCK or non-muscle myosin II inhibitors and imaged over 12 hours then fixed for immunofluorescence. **a**, Representative images MLC and pMLC visualized by Alexa Fluor 594- and 488-conjugated secondary, respectively. **b**, Total MLC intensity per cell. N = 2 independent experiments, n = 25 cells,  $p > 0.15$ , two-tailed Student's unpaired t-test. **c**, Percentage of MLC phosphorylated at Ser19 (i.e., pMLC intensity / total MLC intensity  $\times$  100). N = 2 independent experiments,  $p < .0001$ , two-tailed Student's unpaired t-test. Migrating ECFCs were treated with ROCK or non-muscle myosin II inhibitors and imaged over 12 hours to quantify wound closure and then fixed for immunofluorescence. **d**, Vinculin and actin in migrating ECFCs visualized by 594-conjugated secondary and 488-conjugated phalloidin. **e**, Wound closure rates after treatment with Y27632 (10  $\mu$ M) or blebbistatin (20  $\mu$ M). N = 2 independent experiments,  $p < 0.0001$ , ANOVA with Tukey *post hoc* test. Summary statistics in **b** and **c** are represented as mean  $\pm$  s.e.m.

#### YAP/TAZ regulate NUA2 to control cytoskeletal polymerization

These data suggest that YAP/TAZ mediate feedback control of cytoskeletal and focal adhesion dynamics through the Rho-ROCK-myosin II pathway. We performed a meta-analysis of previously published ChIP-seq and gene expression data and identified SNF-like kinase 2 (NUAK2) as a YAP/TAZ-dependent target gene<sup>31,32</sup>. NUA2 expression is induced by cytoskeletal tension to phosphorylate and deactivate myosin light chain phosphatase (MLCP) and sequester the myosin binding subunit (MYPT1) of MLCP preventing dephosphorylation of myosin II, negating ROCK-mediated myosin activation<sup>8,9</sup>. By perturbing NUA2 expression we

can also orthogonally probe the function of myosin II phosphorylation during migration. Thus, by evaluating migration-inducible NUAK2 expression and function we can define the role Rho-ROCK-myosin II signaling in YAP/TAZ-dependent cytoskeletal and focal adhesion feedback.

As expected, YAP/TAZ depletion abrogated inducible expression of the canonical YAP/TAZ-TEAD target genes, Cyr61 and CTGF (Figure 8a; Extended Data Figure 6a), but also significantly up-regulated NUAK2 at 1 hour post-migration initiation (Figure 8b) consistent with increased myosin phosphorylation (cf. Figure 7). We then tested whether YAP/TAZ/NUAK2 co-depletion (Extended Data Figure 6b) could restore actomyosin architecture compared to control cells. NUAK2 depletion did not alter total actin ( $p > 0.6$ , Figure 8c,d) and had no effect on F-actin fraction in YAP/TAZ-intact cells, but significantly rescued the increase in actin polymerization caused by YAP/TAZ depletion (Figure 8e). We confirmed these results by treating YAP/TAZ-depleted cells with WZ4003, a selective inhibitor of NUAK1&2<sup>33</sup> (Extended Data Figure s7a). WZ4003 treatment significantly decreased actin polymerization as well as total actin in siYAP/TAZ depleted cells (Extended Data Figure s7b,c).

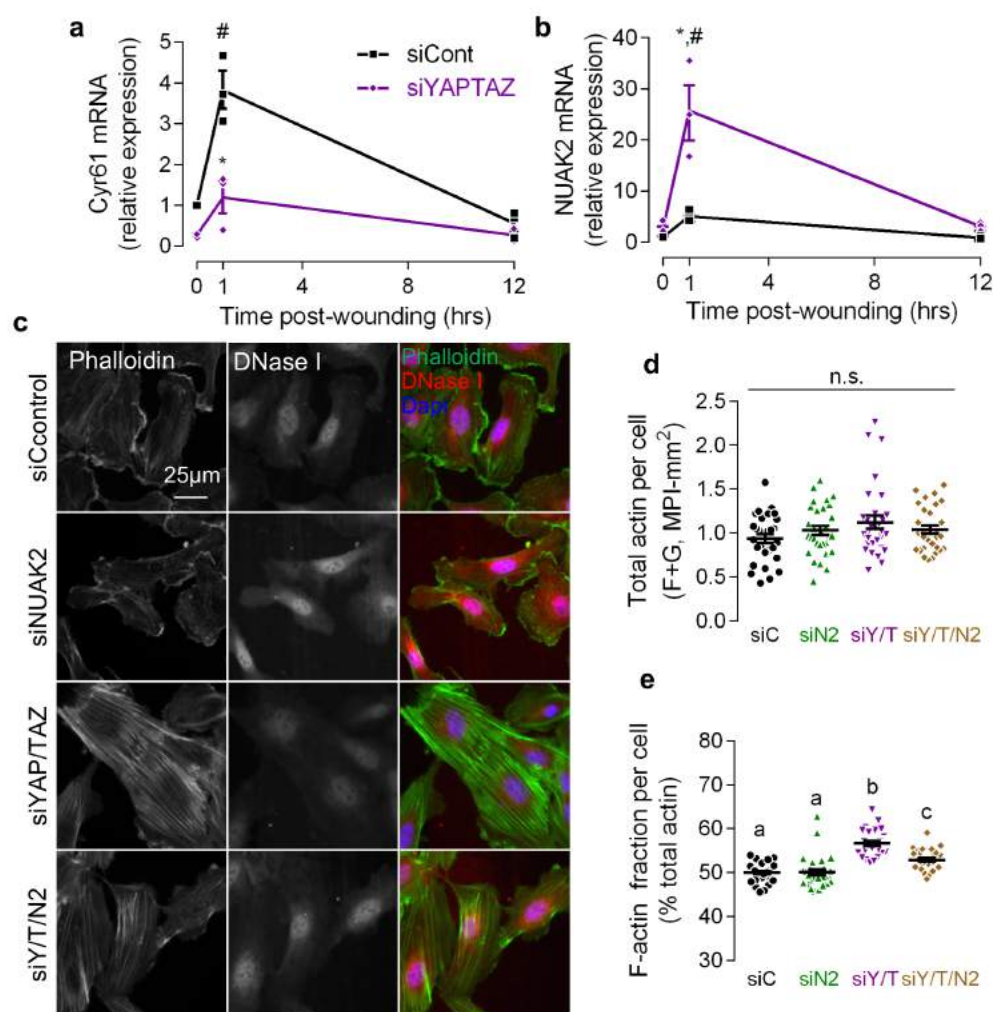

**Figure 8: YAP and TAZ modulate actin polymerization through NUAK2 regulation.** Migrating ECFC lysate was collected at 0, 1, and 12 hours after initiation of migration and gene expression analyzed by RT-qPCR. **a**, Cyr 61 and **b**, NUAK2 gene expression in migrating ECFCs. N = 3 independent experiments, \*  $p < 0.0004$  vs. control at 1 hour, #  $p < 0.0001$  vs. 0 hours, two-way ANOVA with Tukey

*post hoc* test. **c**, Representative images of F- and G- Actin visualized with Alexa Fluor 488-conjugated secondary and 594-conjugated phalloidin. **d**, Total actin intensity measured as the sum of F- and G- actin intensity.  $N = 2$  independent experiments,  $n = 30$  cells,  $p > 0.11$ , ANOVA with Tukey *post hoc* test. **e**, Percentage of filamentous actin measured as  $(F\text{-actin intensity}/\text{total actin}) \times 100\%$ .  $p < 0.0006$ , ANOVA with Tukey *post hoc* test. Summary statistics are represented as mean  $\pm$  s.e.m.

#### *YAP and TAZ spatially control vinculin incorporation into structural focal adhesions via NUA2*

Together, these data implicate YAP and TAZ in feedback control of actomyosin tension through Rho-ROCK-myosin II to prevent cellular tethering at focal adhesions. To specifically evaluate this feedback in structural focal adhesions, we next used detergent solubilization during fixation to remove poorly adherent focal adhesions and Triton-soluble cytoskeletal elements, leaving the structural fraction<sup>34</sup>. The composition of the structural focal adhesions was determined by immunostaining for tension-dependent vinculin and tension-independent paxillin<sup>35</sup> incorporation into focal adhesions in single cells (Figure 9a). YAP/TAZ depletion increased the amount of structural vinculin, without affecting structural paxillin (Figure 9b, Extended Data Figure 8). Focal adhesion size, a measure of maturity, was increased by YAP/TAZ depletion, but NUA2 co-depletion significantly rescued vinculin+ focal adhesion size (Figure 9c).

Focal adhesion remodeling and cell-generated traction is spatially controlled and occurs predominantly at leading and trailing edges<sup>7,36</sup>. Further, in YAP/TAZ-depleted cells, we observe preferential focal adhesion maturation at the cell periphery. Therefore, we subdivided focal adhesions in each cell into peripheral (5  $\mu\text{m}$  from every edge) or central regions (Figure 9d). YAP/TAZ and YAP/TAZ/NUA2 depletion had no effect on focal adhesion number or morphology within the central region of interest (Figure 9e,f); however, in the peripheral region, NUA2 co-depletion significantly rescued focal adhesion length (Figure 9f). We further confirmed these observations using the NUA1/2 inhibitor WZ4003, which normalized focal adhesion morphology in YAP/TAZ-depleted cells (Extended Data Figure 7d). Interestingly, WZ4003 caused near complete loss of vinculin incorporation into focal adhesions, more so than NUA2 depletion or WZ4003 treatment in control cells.

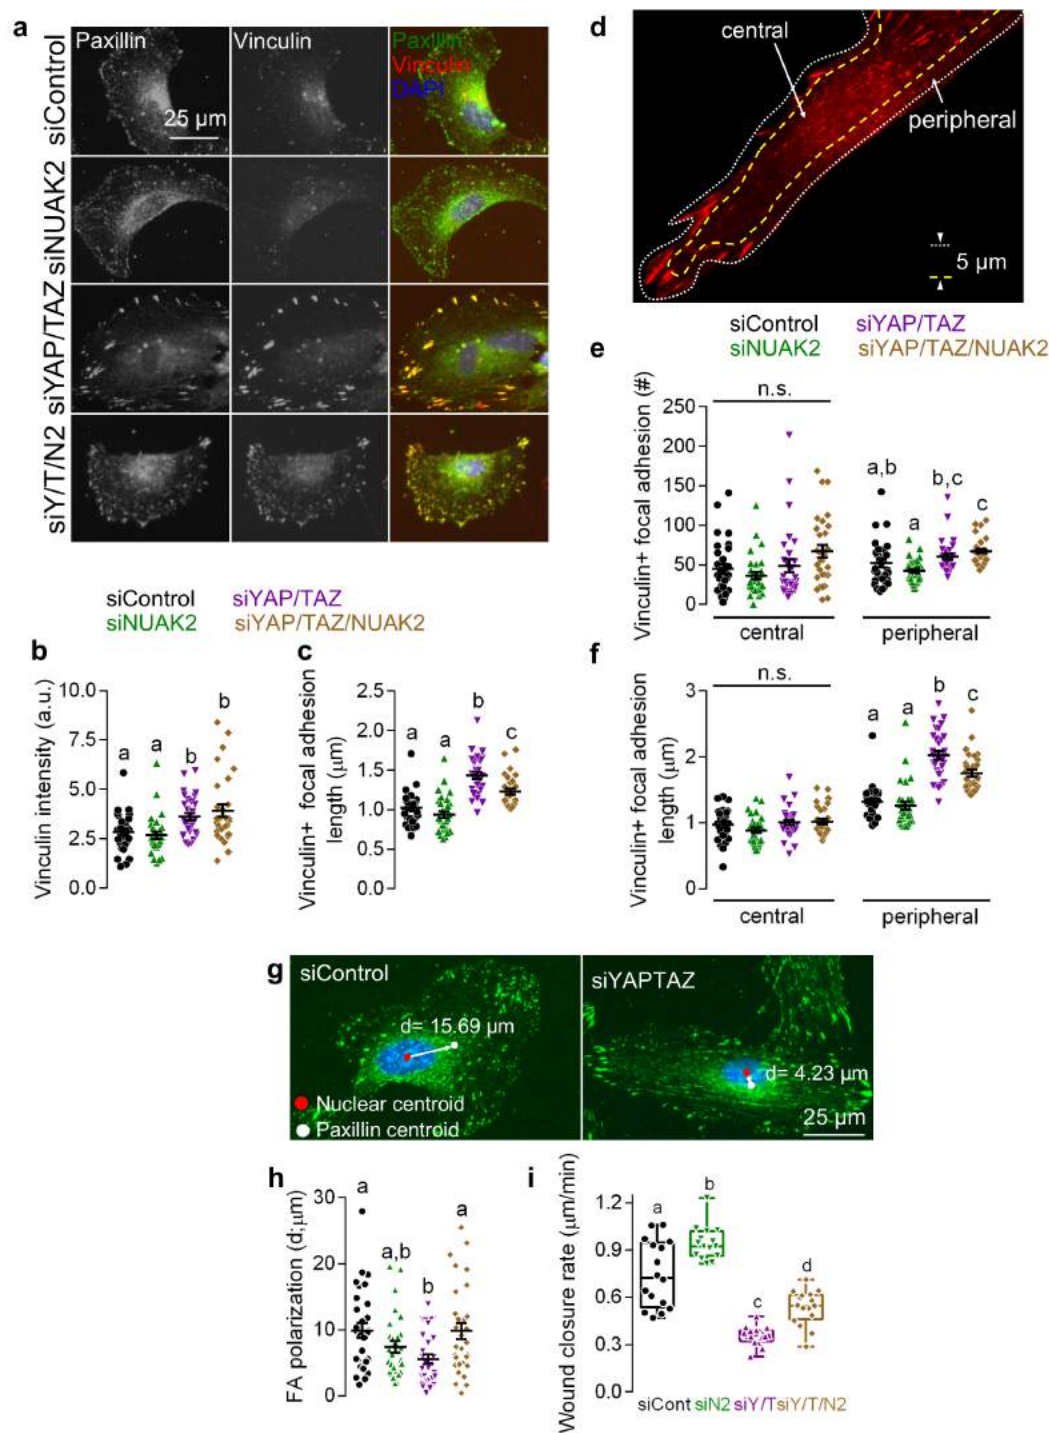

**Figure 9: YAP/TAZ-regulated NUA2 enhances focal adhesion maturation and polarization, resulting in reduced cell motility.** ECFCs depleted of YAP/TAZ and/or NUA2 were plated on collagen coated glass coverslips for 24 hours then triton-extracted concurrent with fixation for immunofluorescence and analysis of structural focal adhesions. **a**, Representative images of vinculin and paxillin visualized with 594- and 488-conjugated secondary, respectively. **b**, Whole cell structural vinculin intensity. N = 2 independent experiments, n = 30 cell,  $p < 0.02$ , ANOVA with Tukey *post hoc* test. **c**, Whole cell vinculin+ focal adhesion length.  $p < 0.003$ , ANOVA with Tukey *post hoc* test. **d**,



Individual cell compartments were subdivided into peripheral and central (5  $\mu\text{m}$  from the edge of the cell) regions to detect spatial differences in focal adhesion morphology. Focal adhesion length, an indicator of maturation, and number, an indicator of formation, were found in individual cells at both peripheral and central regions. **e**, Central ( $p > 0.07$ ) and peripheral ( $p < .002$ ) vinculin+ focal adhesion number. ANOVA with Tukey *post hoc* test and Kruskal-Wallis with Dunn *post hoc* test, respectively. **f**, Central ( $p > 0.1$ ) and peripheral ( $p < 0.006$ ) vinculin+ focal adhesion length. **g**, Representative image of focal adhesion polarization distance indicated by the white line between the nucleus (red dot) and focal adhesion (white dot) intensity centroid. **h**, Focal adhesion polarization distance.  $p < 0.02$ , ANOVA with Tukey *post hoc* test. **i**, Confluent ECFCs were scratched and imaged over 12 hours and wound closure rate quantified.  $N = 2$  independent experiments,  $p < 0.006$ , ANOVA with Tukey *post hoc* test. Summary statistics in **b**, **c**, **e**, **f**, and **i** are represented as mean  $\pm$  s.e.m.

### *YAP/TAZ modulate myosin tension to enable focal adhesion polarization*

Above, we observed that YAP/TAZ depletion impaired persistent and directional cell migration, but did not affect MTOC polarization or initial direction sensation. Persistent forward motility requires that focal adhesions preferentially form at the leading edge, mature in the lamellum, and disengage at the trailing edge<sup>6,36</sup>. To test whether YAP/TAZ regulate focal adhesion polarization, we quantified the distance between the centroid of the nucleus and the centroid of structural focal adhesions (Figure 9g). YAP/TAZ depletion significantly reduced focal adhesion polarization, which was restored by co-depletion of NUA2 (Figure 9h). Finally, we found that NUA2 co-depletion partially rescued YAP/TAZ-dependent anchorage release and migration (Figure 9i), but WZ4003 treatment did not (Extended Data Figure 7e).

### *YAP and TAZ are essential for vasculogenesis and sprouting angiogenesis*

Vasculogenesis is mechanosensitive to 3D matrix mechanical properties<sup>16</sup> and early embryonic vascular remodeling requires hemodynamic force *in vivo*<sup>37</sup>. To control mechanical cues in 3D, we cultured ECFCs in collagen matrices of variable physiologic elasticity. Matrix rigidity was tuned, independent of collagen density, by modulating monomer:oligomer collagen ratio<sup>16,17</sup> (Figure 10a,b). ECFCs were cultured in monomeric ( $G' = 310 \text{ Pa} / E = 9 \text{ kPa}$ ) or oligomeric collagen matrices ( $G' = 1050 \text{ Pa} / E = 23 \text{ kPa}$ ) whose rigidity approximated physiologic and pathologic extracellular matrix, respectively<sup>17</sup> (Figure 10a). Stiffer oligomeric matrices qualitatively enhanced ECFC spreading, vacuolization, and network formation (Figure 10b), consistent with prior findings<sup>16,17</sup>. YAP and TAZ depletion completely abrogated 3D vacuolation and interconnected vasculogenic network formation in oligomeric collagen matrices ( $G' = 132 \text{ Pa}$ ) (Figure 10c). Similarly, in the matrigel tubulogenesis assay, YAP and/or TAZ depletion combinatorially reduced tubular network length and number (Figure 10d,e), with a greater effect of TAZ vs. YAP depletion, consistent with their effects on cytoskeletal dynamics.

ECFCs have potential as an autologous or allogeneic cell source for vasculogenic therapies<sup>14,15</sup>. To evaluate YAP/TAZ activation during transplanted ECFC vasculogenesis *in vivo*, we implanted human ECFC-laden collagen matrices in the subcutaneous space of NOD-scid mice. Establishment of a functional human neovascular plexus was demonstrated by confocal reconstruction of human CD31+ vessels that co-stained with intravenously-perfused Rhodamine-labeled UEA-I lectin (Figure 10f). Immunostained human neovasculature revealed nuclear YAP/TAZ and robust expression of target genes CTGF and Cyr61 during vasculogenesis *in vivo* (Figure 10g).

Finally, we evaluated the transcriptional role of YAP and TAZ in angiogenic sprouting *in vivo* using verteporfin, a selective inhibitor of the YAP/TAZ-TEAD transcriptional complex<sup>38</sup>. We

first demonstrated that 2  $\mu$ M verteporfin treatment reproduced both the cytoskeletal and focal adhesion defects caused by RNAi depletion of YAP/TAZ (Extended Data Figure 9). Like YAP/TAZ siRNA, verteporfin treatment had no effect on total actin ( $p > 0.78$ ), but increased actin polymerization ( $p < 0.0001$ ) as well as vinculin ( $p < 0.0003$ ) and paxillin incorporation ( $p < 0.02$ ) into focal adhesions (Extended Data Figure 9).

To evaluate YAP/TAZ function during sprouting angiogenesis *ex vivo*, we quantified vessel outgrowth in the aortic sprout assay in monomeric and oligomeric collagen fibril matrices with shear moduli of 51 and 132 Pa, respectively. Aortic outgrowth and angiogenic sprouting were enhanced in stiffer oligomeric collagen matrices, but we did not observe a measurable difference in YAP/TAZ subcellular localization in response to 3D matrix rigidity (Extended Data Figure 10). Verteporfin treatment of vessel explants in oligomeric matrices significantly reduced non-vessel cellular outgrowth, a measure of three-dimensional cell migration (Figure 10h, i) and reduced endothelial neovessel length (Figure 10h, j), completely abrogating both cell migration and angiogenesis after day 3.

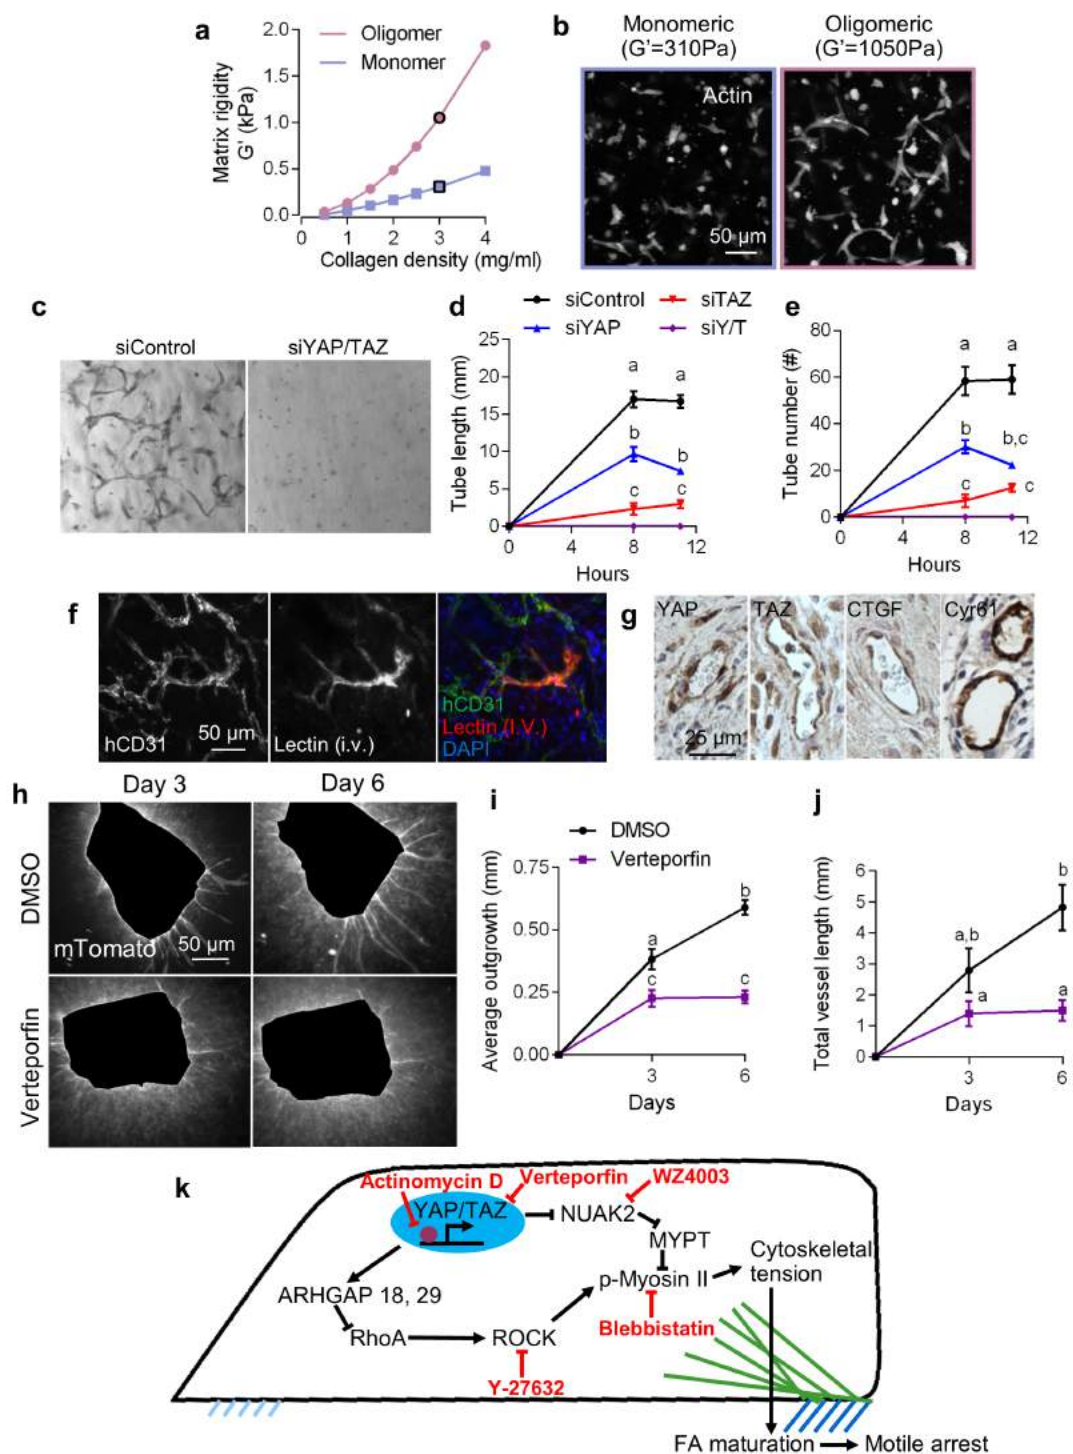

**Figure 10: YAP and TAZ are important for angiogenesis, vasculogenesis, and sprouting angiogenesis.** ECFCs were plated on either matrigel for 12 hours or embedded in collagen matrices for 8 hours. **a,b**, Collagen matrix rigidity can be modulated by using either monomeric or oligomeric collagen, independent of cell density. **b**, Representative images of ECFC vasculogenesis in monomeric ( $G' = 310$  Pa) and oligomeric ( $G' = 1050$  Pa) matrices visualized with 488-conjugated phalloidin. **c**, ECFC vasculogenesis in oligomeric matrices ( $G' = 132$  Pa). **d,e**, Quantification of ECFC tubulogenesis on Matrigel at 8 and 12 hours (**d**) tube length ( $p < 0.0032$ ) and **e** number ( $p < 0.0003$ ).  $N = 2$ ,  $n = 12$ , two-

way ANOVA with Tukey *post hoc* test. **f,g**, ECFC embedded oligomeric matrices recovered from NOD-scid mice where used for immunohistochemistry. **f**, Functioning vasculature and human endothelium was visualized using Rhodamine-conjugated lectin and Alexa Fluor 647-conjugated anti-human CD31 antibody, respectively. **g**, Chromogenic HRP substrate DAB (brown) was used to visualize YAP, TAZ, CTGF, and CYR61 and counterstained with hematoxylin. **h,i,j**, Whole aortas were extracted from 5 CD57BL/6 with the ROSA 26-mTmG transgene, segmented, and embedded in oligomeric collagen for the aortic sprout assay. **h**, Representative images of mTomato expressing cell outgrowth from aortic explants at day 3 and 6. **i**, Average cell outgrowth measured as the average distance from the edge of the explant. N = 5 biological replicates, n = 17-21 rings, p < 0.001, two-way ANOVA with Tukey *post hoc* test. **j**, The sum of all vascular sprout lengths from individual explants. p < 0.03, two-way ANOVA with Tukey *post hoc* test. Summary statistics are represented as mean  $\pm$  s.e.m. **k**, Schematic of the transcriptional negative feedback loop that regulates intracellular tension. Cytoskeletal tension is increased by ROCK activation of myosin II causing YAP and TAZ nuclear localization. Active YAP and TAZ inhibit ROCK-mediated MLC phosphorylation by transcriptional control of NUA2 and arhgap 18, 29 expression, preventing overactivation of myosin II, enabling dynamic control of cytoskeletal tension.

## Discussion

Whether existing proteins are sufficient to maintain migration, independent of transcription, is a matter of debate<sup>39,40</sup>. Here, we show that *de novo* gene transcription is essential for persistent ECFC motility and identify the transcriptional co-activators YAP and TAZ as regulators of migration through cell-intrinsic feedback control of Rho-ROCK-myosin II activity, partially through transcriptional repression of the MLCP regulator NUA2 (Figure 10k). The cytoskeletal dynamics initiated by migration activate YAP and TAZ, which in turn drive a transcriptional program that modulates cell mechanics by limiting cytoskeletal and focal adhesion maturation to maintain a responsive cytoskeletal equilibrium and prevent migration arrest.

Cells require new gene expression to replace consumed or degraded proteins. However, we found that transcription inhibition causes eventual motility arrest, not due to depletion of the components of the molecular clutch, but rather through dysregulated cytoskeletal polymerization and focal adhesion formation and maturation. This is consistent with the reported stability of the molecular clutch proteins. For example, vinculin and talin have a half-life of 18-21 hours<sup>41</sup>,  $\beta$ -actin has a half-life of 48 hours<sup>42</sup>, while myosin contractile motors in muscle are stable for days<sup>43</sup>. Consistently, we observed stress fiber and focal adhesion formation even after long term transcription inhibition. Further, myosin tension generation and subsequent focal adhesion reinforcement occurs more rapidly than *de novo* protein synthesis<sup>2,21</sup>. However, there is ample evidence that immediate early genes are transcriptionally upregulated during migration and enhance cell motility<sup>44-46</sup>. These observations led us to explore the transcriptional mechanisms by which migration initiation modulates cytoskeletal remodeling to enable persistent motility.

We found that YAP/TAZ-mediated transcription is essential to moderate cytoskeletal mechanics, and YAP/TAZ depletion or inhibition mimics the effects of global transcription inhibition. We discovered that YAP and TAZ act to dissipate cytoskeletal tension through a cell-intrinsic feedback mechanism dependent on NUA2 control of myosin II activation. These data contribute to an emerging but conflicting literature regarding the feedback functions of YAP and/or TAZ in regulating cellular and tissue tension. Some recent reports implicate YAP in feed-forward promotion of cytoskeletal tension<sup>31,47</sup>, potentially through outside-in feedback through



regulation of extracellular matrix production and subsequent mechanosensation<sup>48-50</sup>. In contrast, our data are consistent with other evidence from cells that do not produce extensive extracellular matrix, implicating YAP/TAZ-mediated ARHGAP expression in suppression of actin polymerization and cytoskeletal tension<sup>51</sup>. While it is clear that the functions and relative roles of YAP and/or TAZ are highly cell type- and context-dependent<sup>52</sup>, synthesizing the available data, we conclude that YAP/TAZ mediate both cell-autonomous and outside-in feedback systems to modulate cell and tissue tension.

Here, we identify a cell-autonomous feedback pathway by which YAP/TAZ suppress cytoskeletal tension through Rho-ROCK-myosin II signaling, verified through orthogonal mechanical and biochemical measurements. We further validated this negative feedback system through both loss-of-function and rescue experiments featuring pharmacologic and RNAi-based approaches, and identify the YAP/TAZ-TEAD-dependent target gene, NUA2, as a novel negative regulator of cell migration through cytoskeletal tension in ECFCs.

While YAP/TAZ depletion largely recapitulates the effects of global transcription inhibition, other mechanotransductive factors may also contribute to parallel or interacting feedback loops. For example, the transcriptional co-activator MRTF transactivates SRF-dependent gene expression, including actomyosin genes, MLC2 and  $\beta$ -actin, and focal adhesion components talin, vinculin, and zyxin<sup>53,54</sup>. Similarly, AP-1 transcribes cytoskeletal regulators gesolin like capping protein (CapG) and Kelch related protein 1 (Krp1) while downregulating fibronectin<sup>55</sup>. Interestingly, there is significant overlap between MRTF, AP1, and TEAD occupancy at inducible genes<sup>56,57</sup>. We therefore speculate that complex multi-transcription factor dynamics are essential for tuning the cytoskeleton during migration, and further work is warranted to delineate the specific and combinatorial functions of each of these signaling networks.

YAP and TAZ are essential during development and can have either convergent or divergent functions depending on the experimental context. Global deletion of YAP is embryonic lethal, due to impaired vasculogenesis, whereas TAZ knockout mice survive birth but only 50-65% reach adulthood due to polycystic kidney disease<sup>58</sup>. YAP is the most well-studied of the pair, and was hypothesized to have the more potent effect on transcriptional activation, due primarily to the presence of a PXX $\Phi$ P motif<sup>59</sup>. However, a recent structural analysis found a distinct TAZ-TEAD conformation that confers similar or greater transcriptional activity compared to YAP-TEAD<sup>59</sup>. *In vivo* evidence from our group and others have found that YAP vs. TAZ functional redundancy is cell-type specific. For example, YAP is essential, but TAZ dispensable, during cardiac development<sup>60</sup>, while YAP and TAZ are compensatory in bone development with TAZ exhibiting greater potency<sup>52</sup>. Interestingly, we observe a greater effect of TAZ ablation on cytoskeletal feedback, cell migration, and vessel formation in ECFCs. This suggests either differential intrinsic activity or knockdown efficiency, and further work will be required to dissect the potentially distinct co-effector interactions or transcriptional targets.

This study also provides new mechanistic understanding to explain recent observations regarding the roles of YAP and TAZ in cardiovascular function *in vivo*. Recent studies show that endothelial-specific YAP/TAZ deletion is embryonic lethal<sup>61,62</sup>, with defects in retinal angiogenesis, liver vascularization, and hindbrain hemorrhage<sup>63</sup>. Prior data implicates defects in proliferation<sup>32</sup>, tip cell sprouting<sup>62-64</sup>, and vascular integrity<sup>61</sup>. Our findings establish a new YAP/TAZ-Rho-ROCK-myosin II feedback axis as a critical mechanism for neovascular function.

## **Methods**

### **Cell culture and transfection**

ECFCs were isolated from umbilical cord blood as previously described<sup>14,15</sup> and cultured in endothelial growth medium (EGM-2 with bullet kit; Lonza, CC-3162) supplemented with 1% penicillin/streptomycin (Corning) and 10% defined fetal bovine serum (Thermofisher), referred to as full medium. Cells were seeded on collagen (5  $\mu\text{g}/\text{cm}^2$ ) coated tissue culture polystyrene (TCPS) and maintained at 37° Celsius and 5% CO<sub>2</sub>. ECFCs were released from culture dishes using TrypLE™ Express (Gibco) and used between passages 6 and 8.

ECFCs were depleted of YAP and TAZ using siRNA loaded lipofectamine RNAimax (Invitrogen) according to the manufacturer's instructions. Briefly, ECFCs were seeded on collagen coated 6 well-plates, 10<sup>5</sup> cells per well, in antibiotic free medium and kept in culture for 24 hours followed by transfection at approximately 50% confluence. Transfection was carried out using a final concentration 0.3% (v/v) lipofectamine RNAimax with 15 pmol RNAi duplexes (custom oligonucleotides; Dharmacon) per well. Transfected ECFCs were used 24-48 hours post-transfection.

ON-TARGET plus non-targeting siRNA and SMARTpool NUA2 siRNA were obtained from Dharmacon. Custom siRNA were created based on sequences previously described<sup>11</sup>: YAP1, sense, 5'-GACAUCUUCUGGUCAGAGA-3', YAP1, anti-sense, 5'-UCUCUGACCAGAAGAUGUC -3'; YAP2, sense, 5'- CUGGUCAGAGAUACUUCUU -3', YAP2, anti-sense, 5'- AAGAAGUAUCUCUGACCAG -3'; TAZ1, sense, 5'-ACGUUGACUUAGGAACUUU -3', TAZ1, anti-sense, 5'- AAAGUCCUAAGUCAACGU -3'; TAZ2, sense, 5'- AGGUACUCCUCAUCACA -3', TAZ2, anti-sense, 5'- UGUGAUUGAGGAAGUACCU -3'.

### **Animal Handling**

All animal experiments were approved by the institutional animal care and use committee (IACUC) at the University of Notre Dame and Indiana University School of Medicine.

10<sup>6</sup> cord blood derived ECFCs were re-suspended in 250  $\mu\text{l}$  collagen gel (G' = 200Pa, Geniphy, Standardized Oligomer Polymerization Kit) plus 10% human platelet lysate (Cook) on ice and then polymerized for 30 minutes at 37° C in a well of 48 well plate. Matrices were covered with 500 $\mu\text{l}$  culture medium until transplantation. Cellularized matrices were transplanted into the abdominal flanks of 6-12 week old NOD/SCID immunodeficient mice anesthetized by inhaled isoflurane under aseptic conditions. After 14 days, 100  $\mu\text{l}$  of Rhodamine labeled Ulex Europaeus Agglutinin I (UEA I referred to in this report as Lectin, Vector Laboratories) were intravenously injected into the transplanted mice 30 minutes before the mice were euthanized. The grafts were collected from the mice and fixed in 4% paraformaldehyde at 4° C overnight and prepared for immunofluorescence or paraffin embedding.

Whole mouse aortas were extracted as previously described<sup>65</sup>. Briefly, 4-6 week-old C57BL/6 mice with or without the mTomato/mGFP (mTmG) transgene were anesthetized by inhalation of 5% isoflurane in oxygen followed by physical euthanasia by bilateral thoracotomy. Whole aortas from the aortic arch to the abdominal insertion were extracted and cleaned of fat and branching vessels then flushed with dPBS containing 10 U/mL of heparin sodium (Hospira). Aortas were sectioned into 0.5 mm rings and serum starved overnight in EBM-2 with 1% penicillin/streptomycin. Aortic rings were encapsulated in oligomeric collagen (G' = 132 Pa) in 96 well plates with full medium containing either verteporfin (Sigma) or an equal volume of dimethyl sulfoxide (DMSO, Sigma). Fluorescent z-stacks of aortic rings expressing mTmG were

taken with a Leica DMI8 0, 3, and 6 days after polymerization. Sprouting aortas not expressing mTomato were fixed with 4% paraformaldehyde for immunofluorescence.

### **Polyacrylamide hydrogels**

Polyacrylamide hydrogels were prepared as previously described<sup>66</sup> with slight modifications. Briefly, 24x50 mm #1 glass coverslips were washed with soap and water and rinsed in ethanol. Coverslips were functionalized using 0.5% (v/v) 3-(Trimethoxysilyl)propyl methacrylate (sigma) in ethanol. Coverslips were cut to 24x20 mm sections to fit in 6 well plates. Polyacrylamide precursor solutions were prepared from 40% acrylamide (EMD Millipore), 2% Bis-acrylamide (amresco), Tetramethylethylenediamine (TEMED; ThermoFisher), and ammonium persulfate (APS; ameresco). 45  $\mu$ L of polyacrylamide precursor solution was pipetted on to hydrophobic glass slide and topped with the functionalized glass coverslips and allowed to polymerize for 30 minutes.

Hydrogels were functionalized with extracellular matrix (ECM) using techniques described previously<sup>66</sup>. Hydrogels were first treated with hydrazine hydrate (sigma) overnight then washed with deionized water followed by 1 hour in 5% (v/v) acetic acid then 1 hour in deionized water. Collagen (MP Biomedicals) in 50mM sodium acetate buffer (pH 4.5; Sigma) with 4 mg/mL sodium (meta)periodate (Sigma) for half an hour in the dark. ECM was then applied to the hydrazine hydrate functionalized hydrogels for 1 hour. Hydrogels were thoroughly washed in deionized water and equilibrated in PBS overnight. Hydrogels were sterilized for 15 minutes under a germicidal UV lamp then washed in EBM-2 and equilibrated in full medium for at least 8 hours. For immunofluorescence and migration experiments  $8.5 \times 10^3$  cells per  $\text{cm}^2$  were seeded per hydrogel.

### **Migration assays**

Migration assays were performed on confluent layers of transfected and/or inhibitor treated cells. 24 hours post-transfection cells were washed twice in endothelial basal medium (EBM-2) then serum-starved in EBM-2 for 2 hours. The collective migration wounding assay was performed as described previously<sup>67</sup>. Migration was initiated by scratching monolayers vertically and horizontally with the tip of a 200  $\mu$ L pipet tip followed by two washes in EBM-2 and addition of full medium. Actinomycin D (Sigma), puromycin (Sigma), WZ4003 (MedChem Express), Y-27632 (Tocris), and blebbistatin (Sigma) were added into basal medium 1 hour after starting serum starvation and in full medium after initiation of migration. Phase images of migration were taken every 4 hours for 8 or 12 hours on a Leica DMI8 or Zeiss Axio Observer Z1. After 8 or 12 hours cells were fixed for immunofluorescence.

Live migration was performed on ECFCs expressing mTomato or EGFP in confluent or sparse conditions on collagen coated 35mm dishes. GFP-expressing ECFCs were transfected with non-targeting control siRNA, whereas mTomato-expressing ECFCs were transfected with siRNA targeting YAP and TAZ. Cells were seeded in a polydimethylsiloxane stencil with 3x5 mm channels separated by 0.75 mm gaps. 2 hours after plating the barrier was released and seeded regions were imaged in 15 minutes intervals for 10 hours using a Zeiss Axio Observer Z1 inverted microscope with an automated stage. Cells were maintained in an incubation chamber at 37° Celsius, 5% CO<sub>2</sub>, and 95% relative humidity for the duration of the experiment.

### **Immunofluorescence**

Cells were washed twice in EBM-2 and fixed in 4% paraformaldehyde (Alfa Aesar) diluted in cytoskeletal stabilization buffer containing 10 mM 2-(N-morpholino) ethanesulfonic acid, 150 mM potassium chloride, 3 mM magnesium chloride, 2 mM ethylene glycol-bis( $\beta$ -aminoethyl ether)-N,N,N',N'-tetraacetic acid, and .3 M sucrose for 20 minutes at room

temperature. Cells were permeabilized and blocked in PBS containing 0.03% triton x-100 (amresco) with 5% goat serum (Cell Signaling) for one hour. Isolation of stable focal adhesions *in situ* was done by adding 0.05% triton x-100 to the cytoskeletal stabilization buffer to remove the soluble and weakly adhered fraction of focal adhesions, as described previously<sup>34</sup>.

Fixed samples were incubated with antibodies diluted in PBS with 1% BSA: monoclonal YAP ab (1:200, Cell Signaling, 14074), polyclonal TAZ ab (1:250, Cell Signaling, 4883), monoclonal Vinculin ab (1:200, Cell signaling, 13901), MLC (1:200, Cell Signaling, 3672), pMLC (1:200, Cell signaling, 3675),  $\alpha$ -tubulin (1:2000, Cell Signaling, DM18), GM130 (1:200, Cell Signaling, D6B1), Rab7 (1:100, Cell Signaling, D95F2), FAK (1:100, Cell Signaling, 3285), pFAK (1:100, Cell signaling, D20B1), paxillin (4  $\mu$ g/mL, abcam, 80578), polyclonal Alexafluor 594 conjugated anti-rabbit IgG (1:400, Cell Signaling, 8889), and polyclonal Alexafluor 488 conjugated anti-mouse IgG (1:400, Cell Signaling, 4408). F-actin was stained using Alexa fluor 488 conjugated phalloidin (1 unit/mL; Life Technologies) and G-actin stained with Alexa fluor 594 conjugated DNase I (0.3  $\mu$ M; Life Technologies) for 15 minutes.

### Integrin endocytosis assay

$\beta$ 1-integrin endocytosis was performed as previously described<sup>5</sup> Integrin internalization was performed on ECFCs sparsely plated on collagen coated glass cover slips. 24 hours after transfection cover slips were inverted on to 50  $\mu$ L full medium droplets with  $\beta$ 1-integrin ab (10  $\mu$ g/mL, abcam, 12G10) on UV sterilized parafilm. Coverslips were then placed a 4° C for 45 minutes to allow  $\beta$ 1-integrin ab to target active surface integrins while preventing active integrin endocytosis. Coverslips were returned to 6 well plates with pre-warmed full medium and washed 3 times with full medium at 37° C for 30 minutes to allow internalization of integrin-ab conjugates. Coverslips were washed 3 times in 4° C EBM-2 (pH 4.0) to denature any remaining surface-bound antibodies. Cells were briefly washed with physiologic pH EBM-2 (pH 7.4) twice then fixed as previously described in cytoskeletal stabilization buffer. Antibody detection and additional immunostaining was performed as described in the previous section.

### Single-cell nanoindentation

ECFC stiffness at different distances from the leading edge of migrating cells was tested using a PIUMA CHIARO nanoindenter system (Optics11)<sup>68</sup>. A colloidal probe cantilever with a tip radius and spring constant of 9.5  $\mu$ m and 0.068 N/m, respectively, with a loading velocity of 2  $\mu$ m/s was used in this study. Before testing, the sensitivity calibration of the cantilever was conducted by indenting a hard surface (i.e. a petri dish). Briefly, cell stiffness at the leading edge of the wound and in 100  $\mu$ m bins from the leading edge were tested. Two control and three YAP/TAZ depleted samples were tested with a total indentation of 15-32 cells at each measuring location. A customized MATLAB code (The MathWorks, Inc.)<sup>68</sup> was developed to determine contact points between the probe and cells and to identify Young's moduli of the cells using the Hertz contact model:

$$F = \frac{16}{9}ER^{1/2}\delta^{3/2} \quad (1)$$

where  $F$  is applied force,  $\delta$  is indentation depth,  $R$  is the radius of the colloidal probe, and  $E$  is Young's modulus of the cells. The cells were assumed to be incompressible (i.e. Poisson's ratio of 0.5).

### Immunohistochemistry



Collagen matrices containing lectin labelled endothelial cell were stained with 1:100 Alexa Fluor 647 conjugated mouse anti human CD31 antibody (BD pharmigen clone WM59) at 4 °C overnight. Next, the samples were cut into 0.3-0.5mm thick pieces and mounted onto Superfrost Plus Gold microscope glass slides (Thermo Fisher Scientific) with ProLong® Gold Antifade solution with DAPI (Thermo Fisher Scientific). Fluorescent pictures of vessels were taken on an Olympus II confocal microscope.

Paraffin embedded tissues were sectioned, deparaffinized and rehydrated. Heat-induced epitope retrieval was performed by incubating sections in sub-boiling 10 mM citrate buffer (pH 6.0) for 10 minutes followed by washes in deionized water. Non-specific binding was blocked using horse serum from the Vectastain elite avidin-biotin conjugation kit (Vector, ABC kit) and endogenous peroxidase activity was quenched using 0.3% hydrogen peroxide in deionized water. Sections were incubated overnight 4 °C with antibodies targeting YAP (1:400), TAZ (1:400), CTGF (1:400), or Cyr61 (1:400). The ABC kit universal secondary and biotinylated horseradish peroxidase containing reagents were added according to the manufacturer's instructions. Antibody conjugation was detected using ImmPACT DAB peroxidase substrate. Sections were counterstained with hematoxylin and eosin (Sigma), coverslipped, and imaged with a Nikon 90i.

### Western Blot

Cells were washed in ice cold dPBS then lysed in 2x lammeli buffer (Alfa Aesar) 24-30 hours post-transfection. Lysate was denatured by boiling samples for 5 minutes followed by centrifugation at 12,000xg for 15 minutes. Lysate was separated based on molecular weight (MW) using electrophoresis on precast 4-12% Clearpage SDS gels (CBS Scientific) in conjunction with a low range molecular weight ladder (amresco) in TEO-tricine running buffer (CBS Scientific). Proteins were transferred to PVDF membranes (amresco) in tris-glycine transfer buffer (CBS Scientific). Membranes were washed in TBST (GeneTex), blocked in 5% BSA in TBST for one hour, and incubated overnight at 4° Celsius with primary antibodies targeting YAP (1:250), TAZ (1:1000), or GAPDH (1:2000) diluted in blocking buffer. The following day membranes were washed in TBST followed by incubation with HRP-conjugated secondary (1:3000, Cell Signaling, 7074) for one hour at room temperature, washed in TBST, and detected with chemiluminescent substrate (Pierce). Images were taken on Chemi-Doc It®<sup>2</sup> (UVP) and densitometry of bands performed on UVP Chemi-Doc It® software, semi-quantitative comparisons were made after normalizing to GAPDH. Membranes were stripped using a mild stripping buffer pH 2.2 (1.5% glycine (amresco), 1% tween-20, 0.1% SDS (amresco)) twice followed by repeated washes in PBS and TBST.

### RT-qPCR

Total RNA was isolated and purified using the RNeasy mini kit (qiagen). 0.5 µg of total RNA was reversed transcribed using the TaqMan reverse transcription kit (Life Technologies) using the manufacturer's instructions in a thermal cycler eco (Eppendorf). cDNA was mixed with iTaq Universal SYBR supermix (Biorad) and 0.4 µM forward and reverse primers in wells of 96 well PCR plate (Biorad). followed by amplification and quantification with in a CFX connect real time PCR system (Biorad).

| Gene  | Forward (5'-3')       | Reverse (5'-3')        |
|-------|-----------------------|------------------------|
| YAP   | CAACTCCAACCAGCAGCAACA | GCAGCCTCTCCTTCTCCATCTG |
| TAZ   | ACCCACCCACGATGACCCCA  | GCACCCTAACCCAGGCCAC    |
| CTGF  | AGGAGTGGGTGTGTGACGA   | CCAGGCAGTTGGCTCTAATC   |
| Cyr61 | GAGTGGGTCTGTGACGAGGAT | GGTTGTATAGGATGCGAGGCT  |
| NUAK2 | GTCAATCCGGAAGGACAAAA  | TCACGATCTTGCTGCTGTTC   |

|       |                       |                       |
|-------|-----------------------|-----------------------|
| GAPDH | AGGGCTGCTTTTAACTCTGGT | CCCCACTTGATTTTGGAGGGA |
|-------|-----------------------|-----------------------|

## Image analysis

All image analysis (morphometrics, intensity measurements, and individual cell tracking) were performed using an open access NIH software platform, FIJI<sup>69</sup>. Live migration tracking was performed using a semi-automated tracking algorithm, track mate<sup>70</sup>. Cells within 100  $\mu\text{m}$  of the leading cell were considered front cells, all other cells were considered trailing.

Golgi polarization relative to wound edge was found by finding the angle between the horizontal direction of migration and the position vector between the centroid of nuclei and the associated golgi in matlab using positional information obtained in image J. Leading edge cells were defined as cells with 50  $\mu\text{m}$  of the front most cell.

YAP and TAZ activation as a function of cell density was performed on images of cells up to 1.2mm from the actively migrating front. Images were binned into adjacent 100  $\mu\text{m}$  x 950  $\mu\text{m}$  ROI's starting at the leading cell. Total and activated YAP or TAZ is the total integrated fluorescent intensity in an ROI with or without the nuclear fraction digitally removed. Cell area in an ROI is the average area of 5 cells per ROI and density is the number of DAPI stained nuclei across the ROI.

## Statistics

All statistical analyses were performed on Graphpad Prism 6 statistical analysis package. Data is presented with data points where possible and mean  $\pm$  standard deviation unless indicated otherwise. Multiple comparisons were made using analysis of variance (ANOVA) with Tukey's *post hoc* test for pairwise comparisons of normally distributed homoscedastic data. Data that did not meet the ANOVA criteria were analyzed by Kruskal-Wallis with Dunn's *post hoc* test. p-values < 0.05 were considered significant.

## Acknowledgements

We would like to thank William Chris Shelley for his technical assistance with ECFC culture and vasculogenesis assays.

Funding: This project was supported in part by American Heart Association Grant 16SDG31230034 (to J.D.B.), by U.S. National Institutes of Health (NIH) National Center for Advancing Translational Sciences Grant UL1TR001108 (to J.D.B.), and by National Science Foundation Grant 1435467 (to J.D.B.). The authors declare no conflicts of interest.

## Author Contributions

D.M., J.D., D.T.N., and Y.L.: performed the experiments. D.M. and J.B. conceived and designed the experiments and wrote the manuscript. S.V-H., P.Z., and M.Y.: provided reagents, cells, instrumentation, and advice for completing experiments. J.D., D.T.N., Y.L., S.V-H., P.Z., and M.Y.: reviewed and provided feedback on the manuscript.

## References (70 max)

1. Chan CE, Odde DJ. Traction Dynamics of Filopodia on Compliant Substrates. *Science* (80- ) [Internet]. 2008 Dec 12;322(5908):1687–1691. PMID: 19074349
2. Elosegui-Artola A, Oria R, Chen Y, Kosmalska A, Pérez-González C, Castro N, Zhu C,

- Trepats X, Roca-Cusachs P. Mechanical regulation of a molecular clutch defines force transmission and transduction in response to matrix rigidity. *Nat Cell Biol* [Internet]. 2016 May 11;18(5):540–548. PMID: 27065098
3. Wu Z, Plotnikov S V., Moalim AY, Waterman CM, Liu J. Two Distinct Actin Networks Mediate Traction Oscillations to Confer Focal Adhesion Mechanosensing. *Biophys J* [Internet]. 2017 Feb 28;112(4):780–794. PMID: 28256237
  4. Kolega J. Asymmetric distribution of myosin IIB in migrating endothelial cells is regulated by a rho-dependent kinase and contributes to tail retraction. *Mol Biol Cell* [Internet]. American Society for Cell Biology; 2003 Dec;14(12):4745–57. PMID: 12960430
  5. Ezratty EJ, Partridge MA, Gundersen GG. Microtubule-induced focal adhesion disassembly is mediated by dynamin and focal adhesion kinase. *Nat Cell Biol* [Internet]. Nature Publishing Group; 2005 Jun 15;7(6):581–590.
  6. Gupton SL, Waterman-Storer CM. Spatiotemporal Feedback between Actomyosin and Focal-Adhesion Systems Optimizes Rapid Cell Migration. *Cell* [Internet]. 2006 Jun 30;125(7):1361–1374. PMID: 16814721
  7. Totsukawa G, Wu Y, Sasaki Y, Hartshorne DJ, Yamakita Y, Yamashiro S, Matsumura F. Distinct roles of MLCK and ROCK in the regulation of membrane protrusions and focal adhesion dynamics during cell migration of fibroblasts. *J Cell Biol* [Internet]. 2004 Feb 2;164(3):427–439. PMID: 14757754
  8. Zagórska A, Deak M, Campbell DG, Banerjee S, Hirano M, Aizawa S, Prescott AR, Alessi DR. New Roles for the LKB1-NUAK Pathway in Controlling Myosin Phosphatase Complexes and Cell Adhesion. *Sci Signal* [Internet]. 2010;3(115).
  9. Vallenius T, Vaahtomeri K, Kovac B, Osiceanu A-M, Viljanen M, Makela TP. An association between NUAK2 and MRIP reveals a novel mechanism for regulation of actin stress fibers. *J Cell Sci* [Internet]. 2011 Feb 1;124(3):384–393. PMID: 21242312
  10. Shen T-L, Park AY-J, Alcaraz A, Peng X, Jang I, Koni P, Flavell RA, Gu H, Guan J-L. Conditional knockout of focal adhesion kinase in endothelial cells reveals its role in angiogenesis and vascular development in late embryogenesis. *J Cell Biol* [Internet]. Rockefeller University Press; 2005 Jun 20;169(6):941–52. PMID: 15967814
  11. Dupont S, Morsut L, Aragona M, Enzo E, Giulitti S, Cordenonsi M, Zanconato F, Le Digabel J, Forcato M, Bicciato S, Elvassore N, Piccolo S. Role of YAP/TAZ in mechanotransduction. *Nature* [Internet]. Nature Publishing Group; 2011;474(7350):179–183. PMID: 21654799
  12. Wada K-I, Itoga K, Okano T, Yonemura S, Sasaki H. Hippo pathway regulation by cell morphology and stress fibers. *Development* [Internet]. 2011;138(18).
  13. Asahara T, Murohara T, Sullivan A, Silver M, van der Zee R, Li T, Witzenbichler B, Schatteman G, Isner JM. Isolation of putative progenitor endothelial cells for angiogenesis. *Science* [Internet]. 1997 Feb 14;275(5302):964–7. PMID: 9020076
  14. Ingram DA, Mead LE, Moore DB, Woodard W, Fenoglio A, Yoder MC. Vessel wall-derived endothelial cells rapidly proliferate because they contain a complete hierarchy of endothelial progenitor cells. *Blood* [Internet]. 2005 Apr 1;105(7):2783–2786. PMID: 15585655
  15. Ingram DA, Mead LE, Tanaka H, Meade V, Fenoglio A, Mortell K, Pollok K, Ferkowicz

- MJ, Gilley D, Yoder MC. Identification of a novel hierarchy of endothelial progenitor cells using human peripheral and umbilical cord blood. *Blood*. 2004; PMID: 15226175
16. Bailey JL, Critser PJ, Whittington C, Kuske JL, Yoder MC, Voytik-Harbin SL. Collagen oligomers modulate physical and biological properties of three-dimensional self-assembled matrices. *Biopolymers* [Internet]. Wiley Subscription Services, Inc., A Wiley Company; 2011 Feb;95(2):77–93.
  17. Whittington CF, Yoder MC, Voytik-Harbin SL. Collagen-polymer guidance of vessel network formation and stabilization by endothelial colony forming cells in vitro. *Macromol Biosci* [Internet]. NIH Public Access; 2013 Sep;13(9):1135–49. PMID: 23832790
  18. Lei Q-Y, Zhang H, Zhao B, Zha Z-Y, Bai F, Pei X-H, Zhao S, Xiong Y, Guan K-L. TAZ Promotes Cell Proliferation and Epithelial-Mesenchymal Transition and Is Inhibited by the Hippo Pathway. *Mol Cell Biol* [Internet]. 2008 Apr 1;28(7):2426–2436. PMID: 18227151
  19. Moroishi T, Park HW, Qin B, Chen Q, Meng Z, Plouffe SW, Taniguchi K, Yu F-X, Karin M, Pan D, Guan K-L. A YAP/TAZ-induced feedback mechanism regulates Hippo pathway homeostasis. *Genes Dev* [Internet]. 2015 Jun 15;29(12):1271–1284. PMID: 26109050
  20. Wang N, Tolic-Norrelykke IM, Chen J, Mijailovich SM, Butler JP, Fredberg JJ, Stamenovic D. Cell prestress. I. Stiffness and prestress are closely associated in adherent contractile cells. *AJP Cell Physiol* [Internet]. 2002 Mar 1;282(3):C606–C616. PMID: 11832346
  21. Polte TR, Eichler GS, Wang N, Ingber DE. Extracellular matrix controls myosin light chain phosphorylation and cell contractility through modulation of cell shape and cytoskeletal prestress. *Am J Physiol Physiol* [Internet]. 2004 Mar;286(3):C518–C528. PMID: 14761883
  22. Roan E, Wilhelm KR, Waters CM. Kymographic Imaging of the Elastic Modulus of Epithelial Cells during the Onset of Migration. *Biophys J* [Internet]. 2015 Nov 17;109(10):2051–2057. PMID: 26588564
  23. Gerhardt H, Golding M, Fruttiger M, Ruhrberg C, Lundkvist A, Abramsson A, Jeltsch M, Mitchell C, Alitalo K, Shima D, Betsholtz C. VEGF guides angiogenic sprouting utilizing endothelial tip cell filopodia. *J Cell Biol* [Internet]. 2003 Jun 23;161(6):1163–77. PMID: 12810700
  24. Kupfer A, Louvard D, Singer SJ. Polarization of the Golgi apparatus and the microtubule-organizing center in cultured fibroblasts at the edge of an experimental wound. *Proc Natl Acad Sci U S A* [Internet]. National Academy of Sciences; 1982 Apr;79(8):2603–7. PMID: 7045867
  25. Han SJ, Bielawski KS, Ting LH, Rodriguez ML, Sniadecki NJ. Decoupling Substrate Stiffness, Spread Area, and Micropost Density: A Close Spatial Relationship between Traction Forces and Focal Adhesions. *Biophys J* [Internet]. 2012 Aug 22;103(4):640–648. PMID: 22947925
  26. Carlson TR, Hu H, Braren R, Kim YH, Wang RA. Cell-autonomous requirement for beta1 integrin in endothelial cell adhesion, migration and survival during angiogenesis in mice. *Development* [Internet]. NIH Public Access; 2008 Jun;135(12):2193–202. PMID: 18480158
  27. Arjonen A, Alanko J, Veltel S, Ivaska J. Distinct Recycling of Active and Inactive  $\beta 1$



- Integrins. Traffic [Internet]. 2012 Apr;13(4):610–625. PMID: 2222055
28. Oakes PW, Beckham Y, Stricker J, Gardel ML. Tension is required but not sufficient for focal adhesion maturation without a stress fiber template. J Cell Biol [Internet]. Rockefeller University Press; 2012 Feb 6;196(3):363–74. PMID: 22291038
  29. Fernandez-Gonzalez R, Simoes S de M, Röper J-C, Eaton S, Zallen JA. Myosin II Dynamics Are Regulated by Tension in Intercalating Cells. Dev Cell [Internet]. 2009 Nov;17(5):736–743. PMID: 19879198
  30. Luo T, Mohan K, Iglesias PA, Robinson DN. Molecular mechanisms of cellular mechanosensing. Nat Mater [Internet]. 2013 Oct 20;12(11):1064–1071. PMID: 24141449
  31. Lin C, Yao E, Zhang K, Jiang X, Croll S, Thompson-Peer K, Chuang P-T. YAP is essential for mechanical force production and epithelial cell proliferation during lung branching morphogenesis. Elife [Internet]. eLife Sciences Publications, Ltd; 2017 Mar 21;6. PMID: 28323616
  32. Shen Z, Stanger BZ, Sudol M, Strano S, Blandino G. YAP Regulates S-Phase Entry in Endothelial Cells. Koepf DM, editor. PLoS One [Internet]. Public Library of Science; 2015 Jan 30;10(1):e0117522.
  33. Banerjee S, Buhrlage SJ, Huang H-T, Deng X, Zhou W, Wang J, Traynor R, Prescott AR, Alessi DR, Gray NS. Characterization of WZ4003 and HTH-01-015 as selective inhibitors of the LKB1-tumour-suppressor-activated NIAK kinases. Biochem J [Internet]. Portland Press Ltd; 2014 Jan 1;457(1):215–25. PMID: 24171924
  34. Yamashita H, Ichikawa T, Matsuyama D, Kimura Y, Ueda K, Craig SW, Harada I, Kioka N. The role of the interaction of the vinculin proline-rich linker region with vinexin in sensing the stiffness of the extracellular matrix. J Cell Sci [Internet]. 2014 May 1;127(9):1875–1886. PMID: 24554436
  35. Pasapera AM, Schneider IC, Rericha E, Schlaepfer DD, Waterman CM. Myosin II activity regulates vinculin recruitment to focal adhesions through FAK-mediated paxillin phosphorylation. J Cell Biol [Internet]. Rockefeller University Press; 2010 Mar 22;188(6):877–90. PMID: 20308429
  36. Cynthia A. Reinhart-King ‡, Micah Dembo § and, Daniel A. Hammer\* ‡. Endothelial Cell Traction Forces on RGD-Derivatized Polyacrylamide Substrata†. American Chemical Society ; 2002;
  37. Lucitti JL, Jones EA V., Huang C, Chen J, Fraser SE, Dickinson ME. Vascular remodeling of the mouse yolk sac requires hemodynamic force. Development [Internet]. 2007 Aug 8;134(18):3317–3326. PMID: 17720695
  38. Liu-Chittenden Y, Huang B, Shim JS, Chen Q, Lee S-J, Anders RA, Liu JO, Pan D. Genetic and pharmacological disruption of the TEAD-YAP complex suppresses the oncogenic activity of YAP. Genes Dev [Internet]. 2012 Jun 15;26(12):1300–1305. PMID: 22677547
  39. WEISS L, CHANG MK. Some Effects of Actinomycin D, Cycloheximide and Puromycin on Cell Adhesion. J Cell Sci. 1973;12(2).
  40. Chen P, Gupta K, Wells A. Cell movement elicited by epidermal growth factor receptor requires kinase and autophosphorylation but is separable from mitogenesis. J Cell Biol [Internet]. 1994 Feb;124(4):547–55. PMID: 8106552

41. Lee S, Otto JJ. Differences in Turnover Rates of Vinculin and Talin Caused by Viral Transformation and Cell Density. *Exp Cell Res* [Internet]. 1996 Sep 15;227(2):352–359. PMID: 8831573
42. Antecol MH, Darveau A, Sonenberg N, Mukherjee BB. Altered biochemical properties of actin in normal skin fibroblasts from individuals predisposed to dominantly inherited cancers. *Cancer Res* [Internet]. 1986 Apr;46(4 Pt 1):1867–73. PMID: 3948169
43. Martin AF, Rabinowitz M, Blough R, Prior G, Zak R. Measurements of half-life of rat cardiac myosin heavy chain with leucyl-tRNA used as precursor pool. *J Biol Chem* [Internet]. 1977 May 25;252(10):3422–9. PMID: 863888
44. O'Brien TP, Yang GP, Sanders L, Lau LF. Expression of *cyr61*, a growth factor-inducible immediate-early gene. *Mol Cell Biol* [Internet]. 1990 Jul;10(7):3569–77. PMID: 2355916
45. Ryseck RP, Macdonald-Bravo H, Mattéi MG, Bravo R. Structure, mapping, and expression of *fisp-12*, a growth factor-inducible gene encoding a secreted cysteine-rich protein. *Cell Growth Differ* [Internet]. 1991 May;2(5):225–33. PMID: 1888698
46. Pepper MS, Sappino AP, Montesano R, Orci L, Vassalli J-D. Plasminogen activator inhibitor-1 is induced in migrating endothelial cells. *J Cell Physiol* [Internet]. Wiley Subscription Services, Inc., A Wiley Company; 1992 Oct 1;153(1):129–139.
47. Nardone G, Oliver-De La Cruz J, Vrbsky J, Martini C, Pribyl J, Skládal P, Pešl M, Caluori G, Pagliari S, Martino F, Maceckova Z, Hajduch M, Sanz-Garcia A, Pugno NM, Stokin GB, Forte G. YAP regulates cell mechanics by controlling focal adhesion assembly. *Nat Commun* [Internet]. Nature Publishing Group; 2017 May 15;8:15321.
48. Porazinski S, Wang H, Asaoka Y, Behrndt M, Miyamoto T, Morita H, Hata S, Sasaki T, Krens SFG, Osada Y, Asaka S, Momoi A, Linton S, Miesfeld JB, Link BA, Senga T, Castillo-Morales A, Urrutia AO, Shimizu N, Nagase H, Matsuura S, Bagby S, Kondoh H, Nishina H, Heisenberg C-P, Furutani-Seiki M. YAP is essential for tissue tension to ensure vertebrate 3D body shape. *Nature* [Internet]. 2015 May 16;521(7551):217–221. PMID: 25778702
49. Calvo F, Ege N, Grande-Garcia A, Hooper S, Jenkins RP, Chaudhry SI, Harrington K, Williamson P, Moeendarbary E, Charras G, Sahai E. Mechanotransduction and YAP-dependent matrix remodelling is required for the generation and maintenance of cancer-associated fibroblasts. *Nat Cell Biol* [Internet]. 2013 Jun 26;15(6):637–646. PMID: 23708000
50. Liu F, Lagares D, Choi KM, Stopfer L, Marinković A, Vrbanac V, Probst CK, Hiemer SE, Sisson TH, Horowitz JC, Rosas IO, Fredenburgh LE, Feghali-Bostwick C, Varelas X, Tager AM, Tschumperlin DJ. Mechanosignaling through YAP and TAZ drives fibroblast activation and fibrosis. *Am J Physiol - Lung Cell Mol Physiol* [Internet]. 2015 Feb 15;308(4):L344–L357. PMID: 25502501
51. Qiao Y, Chen J, Lim YB, Finch-Edmondson ML, Seshachalam VP, Qin L, Jiang T, Low BC, Singh H, Lim CT, Sudol M. YAP Regulates Actin Dynamics through ARHGAP29 and Promotes Metastasis. *Cell Rep* [Internet]. Elsevier; 2017 May 23;19(8):1495–1502. PMID: 28538170
52. Kegelman CD, Mason DE, Dawahare JH, Horan DJ, Vigil GD, Howard SS, Robling AG, Bellido TM, Boerckel JD. Skeletal cell YAP and TAZ combinatorially promote bone development. *FASEB J. Federation of American Societies for Experimental*

BiologyBethesda, MD, USA; 2018 Jan;fj.201700872R.

53. Esnault C, Stewart A, Gualdrini F, East P, Horswell S, Matthews N, Treisman R. Rho-actin signaling to the MRTF coactivators dominates the immediate transcriptional response to serum in fibroblasts. *Genes Dev* [Internet]. Cold Spring Harbor Laboratory Press; 2014 May 1;28(9):943–58. PMID: 24732378
54. Medjkane S, Perez-Sanchez C, Gaggioli C, Sahai E, Treisman R. Myocardin-related transcription factors and SRF are required for cytoskeletal dynamics and experimental metastasis. *Nat Cell Biol* [Internet]. 2009 Mar 8;11(3):257–268. PMID: 19198601
55. Ozanne BW, Spence HJ, McGarry LC, Hennigan RF. Transcription factors control invasion: AP-1 the first among equals. *Oncogene* [Internet]. 2007 Jan 26;26(1):1–10. PMID: 16799638
56. Enzo E, Santinon G, Pocaterra A, Aragona M, Bresolin S, Forcato M, Grifoni D, Pession A, Zanconato F, Guzzo G, Bicciato S, Dupont S. Aerobic glycolysis tunes YAP/TAZ transcriptional activity. *EMBO J* [Internet]. 2015 May 12;34(10):1349–70. PMID: 25796446
57. Kim T, Hwang D, Lee D, Kim J, Kim S, Lim D. MRTF potentiates TEAD-YAP transcriptional activity causing metastasis. *EMBO J* [Internet]. 2017 Feb 15;36(4):520–535. PMID: 28028053
58. Hossain Z, Ali SM, Ko HL, Xu J, Ng CP, Guo K, Qi Z, Ponniah S, Hong W, Hunziker W. Glomerulocystic kidney disease in mice with a targeted inactivation of *Wwtr1*. *Proc Natl Acad Sci U S A* [Internet]. National Academy of Sciences; 2007 Jan 30;104(5):1631–6. PMID: 17251353
59. Kaan HYK, Chan SW, Tan SKJ, Guo F, Lim CJ, Hong W, Song H. Crystal structure of TAZ-TEAD complex reveals a distinct interaction mode from that of YAP-TEAD complex. *Sci Rep* [Internet]. Nature Publishing Group; 2017 Dec 17;7(1):2035.
60. Xin M, Kim Y, Sutherland LB, Murakami M, Qi X, McAnally J, Porrello ER, Mahmoud AI, Tan W, Shelton JM, Richardson JA, Sadek HA, Bassel-Duby R, Olson EN. Hippo pathway effector Yap promotes cardiac regeneration. *Proc Natl Acad Sci U S A* [Internet]. National Academy of Sciences; 2013 Aug 20;110(34):13839–44. PMID: 23918388
61. Kim J, Kim YH, Kim J, Park DY, Bae H, Lee D-H, Kim KH, Hong SP, Jang SP, Kubota Y, Kwon Y-G, Lim D-S, Koh GY. YAP/TAZ regulates sprouting angiogenesis and vascular barrier maturation. *J Clin Invest* [Internet]. American Society for Clinical Investigation; 2017 Sep 1;127(9):3441–3461.
62. Wang X, Freire Valls A, Schermann G, Shen Y, Moya IM, Castro L, Urban S, Solecki GM, Winkler F, Riedemann L, Jain RK, Mazzone M, Schmidt T, Fischer T, Halder G, Ruiz de Almodóvar C. YAP/TAZ Orchestrate VEGF Signaling during Developmental Angiogenesis. *Dev Cell* [Internet]. Elsevier; 2017 Sep 11;42(5):462–478.e7. PMID: 28867486
63. Sakabe M, Fan J, Odaka Y, Liu N, Hassan A, Duan X, Stump P, Byerly L, Donaldson M, Hao J, Fruttiger M, Lu QR, Zheng Y, Lang RA, Xin M. YAP/TAZ-CDC42 signaling regulates vascular tip cell migration. *Proc Natl Acad Sci U S A* [Internet]. National Academy of Sciences; 2017 Oct 10;114(41):10918–10923. PMID: 28973878
64. Choi H-J, Zhang H, Park H, Choi K-S, Lee H-W, Agrawal V, Kim Y-M, Kwon Y-G. Yes-

- associated protein regulates endothelial cell contact-mediated expression of angiopoietin-2. *Nat Commun* [Internet]. Nature Publishing Group; 2015;6(1):6943.
65. Baker M, Robinson SD, Lechertier T, Barber PR, Tavora B, D'Amico G, Jones DT, Vojnovic B, Hodivala-Dilke K. Use of the mouse aortic ring assay to study angiogenesis. *Nat Protoc* [Internet]. 2011 Dec 22;7(1):89–104. PMID: 22193302
  66. Damljanovi?? V, Lagerholm BC, Jacobson K. Bulk and micropatterned conjugation of extracellular matrix proteins to characterized polyacrylamide substrates for cell mechanotransduction assays. *Biotechniques*. 2005;39(6):847–851. PMID: 16382902
  67. Boerckel JD, Chandrasekharan UM, Waitkus MS, Tillmaand EG, Bartlett R, DiCorleto PE. Mitogen-activated protein kinase phosphatase-1 promotes neovascularization and angiogenic gene expression. *Arterioscler Thromb Vasc Biol*. 2014;34(5).
  68. Casey J, Yue X, Nguyen TD, Acun A, Zellmer VR, Zhang S, Zorlutuna P. 3D hydrogel-based microwell arrays as a tumor microenvironment model to study breast cancer growth. *Biomed Mater* [Internet]. 2017 Mar 15;12(2):25009. PMID: 28143999
  69. Schindelin J, Arganda-Carreras I, Frise E, Kaynig V, Longair M, Pietzsch T, Preibisch S, Rueden C, Saalfeld S, Schmid B, Tinevez J-Y, White DJ, Hartenstein V, Eliceiri K, Tomancak P, Cardona A. Fiji: an open-source platform for biological-image analysis. *Nat Methods* [Internet]. 2012 Jun 28;9(7):676–682. PMID: 22743772
  70. Tinevez J-Y, Perry N, Schindelin J, Hoopes GM, Reynolds GD, Laplantine E, Bednarek SY, Shorte SL, Eliceiri KW. TrackMate: An open and extensible platform for single-particle tracking. *Methods* [Internet]. 2017 Feb 15;115:80–90. PMID: 27713081



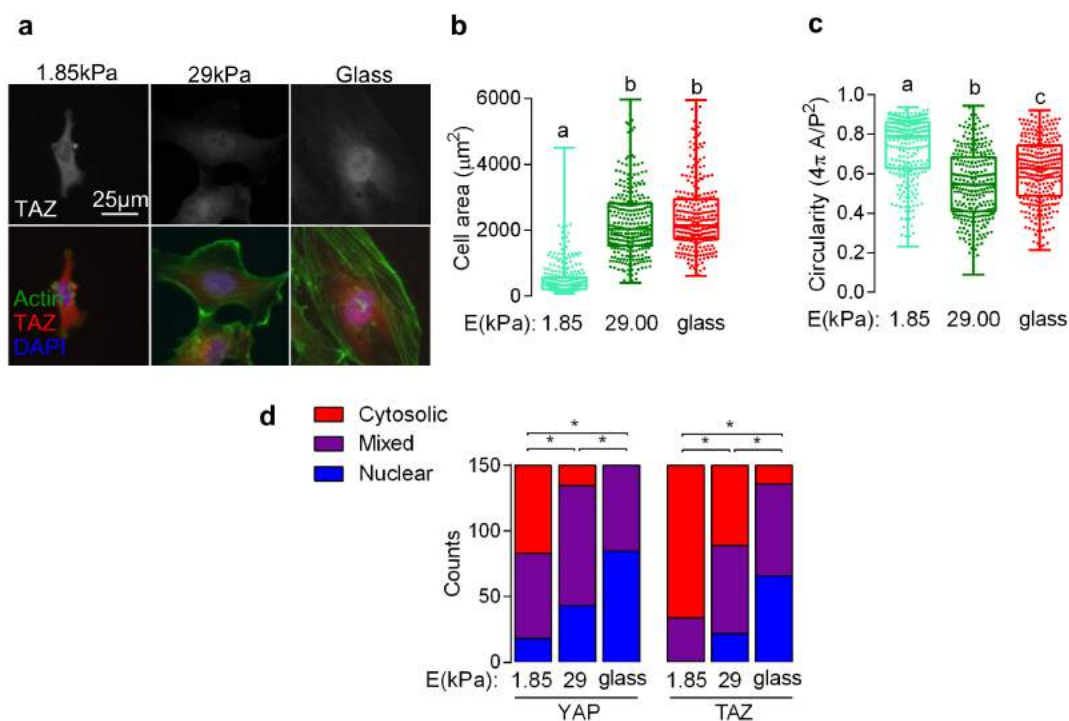

**Extended Data Figure 1: YAP and TAZ nuclear localization are sensitive to rigidity in ECFCs.** ECFCs were seeded at  $8.5 \times 10^3$  cells per  $\text{cm}^2$  on collagen coated soft or stiff polyacrylamide or glass for 24 hours then fixed and stained for YAP (not shown) and TAZ. **a**, Representative images actin, TAZ, and nuclei visualized with Alexa Fluor 488- and 594-conjugated phalloidin and secondary and DAPI, respectively. **b**, Individual cell area and **c**, circularity as a function of substrate elastic modulus. **d**, Cumulative counts of YAP or TAZ subcellular localization based on qualitative assessment,  $N = 3$  separate experiments,  $n = 150$  cells per condition,  $p < 0.0001$ , Chi-square test.

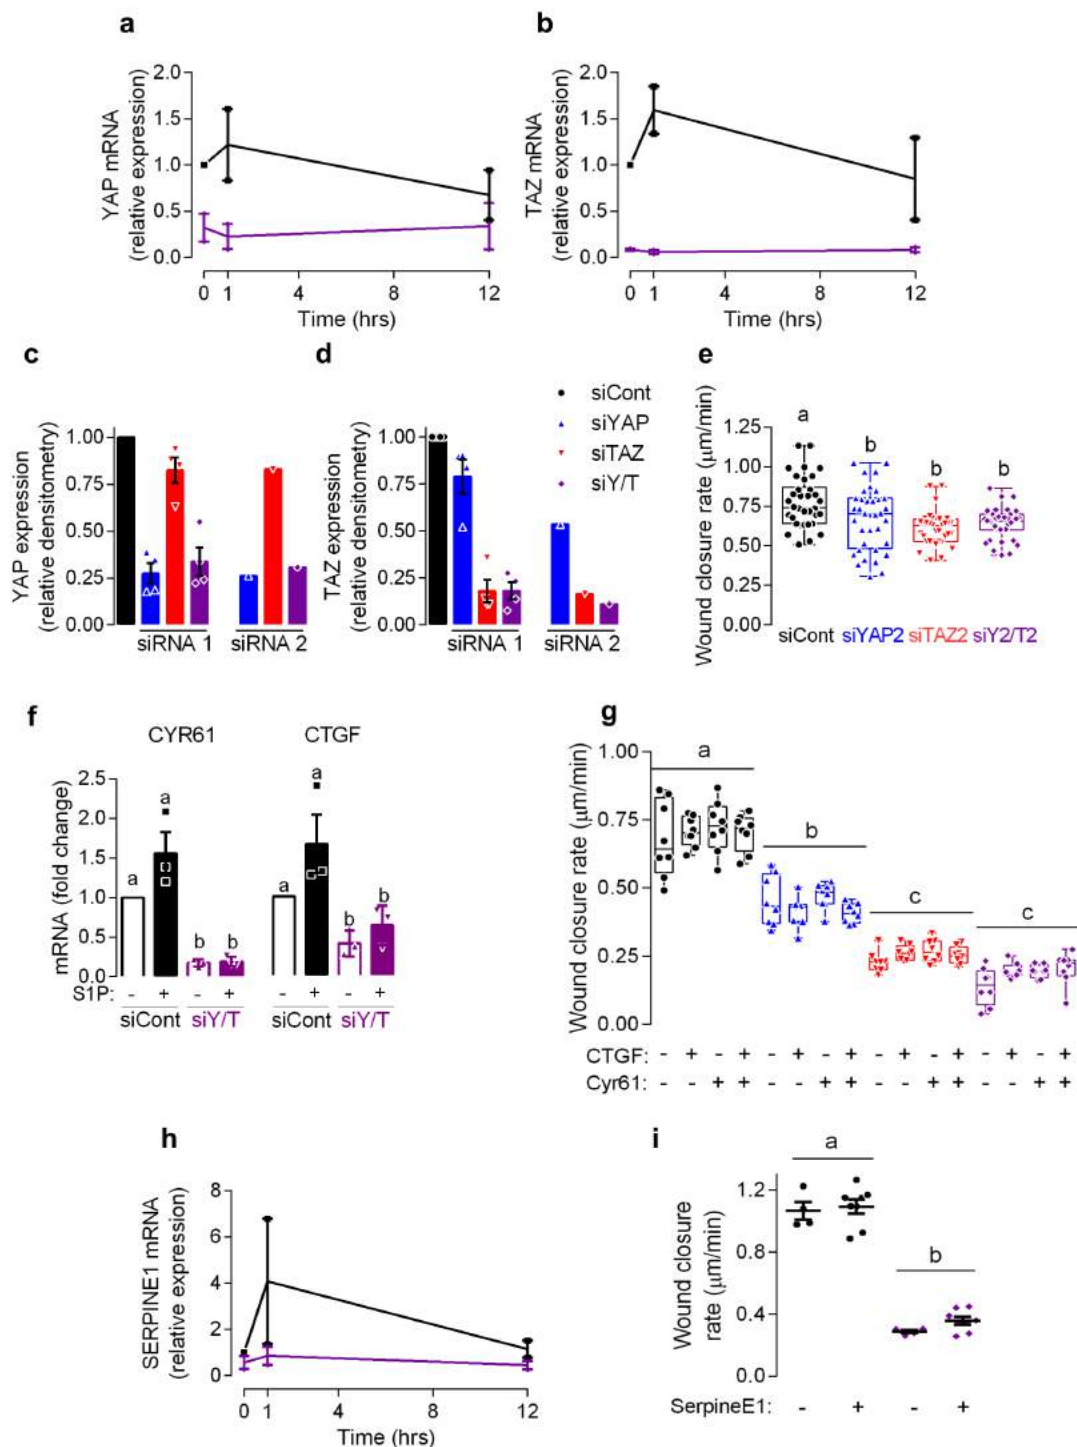

**Extended Data Figure 2: Reconstitution of YAP/TAZ-dependent angiocrines CTGF, Cyr61, or SERPINE1 does not rescue ECFC migration.** Confluent ECFCs were scratched and lysate collected for gene expression 0, 1, and 12 hours after initiation of migration. **a**, YAP and **b**, TAZ mRNA expression in migrating ECFCs depleted of YAP and TAZ, N = 2 independent experiments. **c**, YAP and **d**, TAZ protein expression after depletion with siRNA #1 and #2. **e**, Wound closure rate of confluent ECFCs imaged over 12 hours after depletion of YAP and TAZ with siRNA #2, N = 2 independent experiments,  $p < 0.01$ , ANOVA with Tukey *post hoc* test. **f**, CTGF and Cyr61 gene expression after treatment with sphingosine-

1-phosphate for 1 hour followed by lysis and RNA collection for RT-qPCR. N = 2 independent experiments,  $p < 0.01$ , ANOVA with Tukey *post hoc* test. **g**, Wound closure rate of cells treated with 50 and 100 ng/mL of CTGF and/or Cyr61. Groups treated with 50 or 100 ng/mL were combined for analysis, as there were no differences in wound closure between those treatments, N = 1 experiment,  $p < 0.0001$ , ANOVA with Tukey *post hoc* test. Migrating ECFCs were lysed at 0, 1, and 12 hours after the initiation of migration and lysate use for RT-qPCR. **h**, SERPINE1 gene expression during migration. N = 2 independent experiments. **i**, Wound closure rate after treatment with 50 or 100 ng/mL of SERPINE1. Groups treated with 50 or 100 ng/mL were combined for analysis, as there were no differences in wound closure between those treatments, N = 1,  $p < 0.0001$ , ANOVA with Tukey *post hoc* test. Summary statistics in **a**, **b**, **c**, **d**, **g**, **f** and **h** are represented as mean  $\pm$  s.e.m.

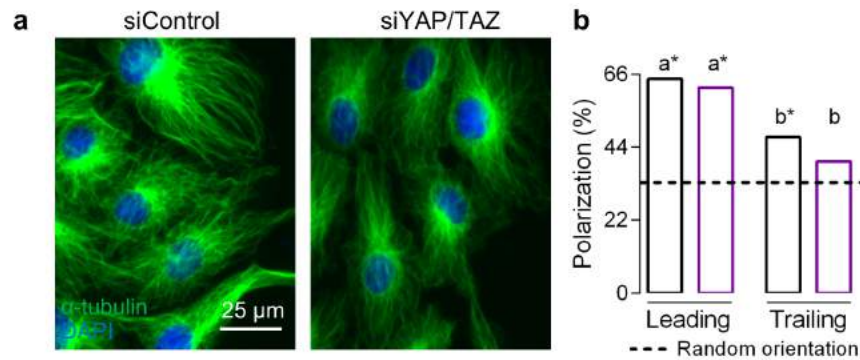

**Extended Data Figure 3: YAP and TAZ are important for collective polarization, but dispensable for single cell polarization.** Confluent ECFCs were scratched and allowed to migrate for 8 hours followed by fixation for immunofluorescence and polarization analysis. **a**,  $\alpha$ -tubulin and nuclei visualized by Alexa Fluor 488-conjugated secondary and DAPI, respectively. **b**, Percentage of cells with golgi polarized in the direction of the wound edge in leading and trailing regions, N = 2 independent experiments, n = 100-105 leading, 350-360 trailing, and 342-421 confluent cells,  $p < 0.02$ , \*  $p < 0.002$ , ANOVA with Bonferroni *post hoc* test.

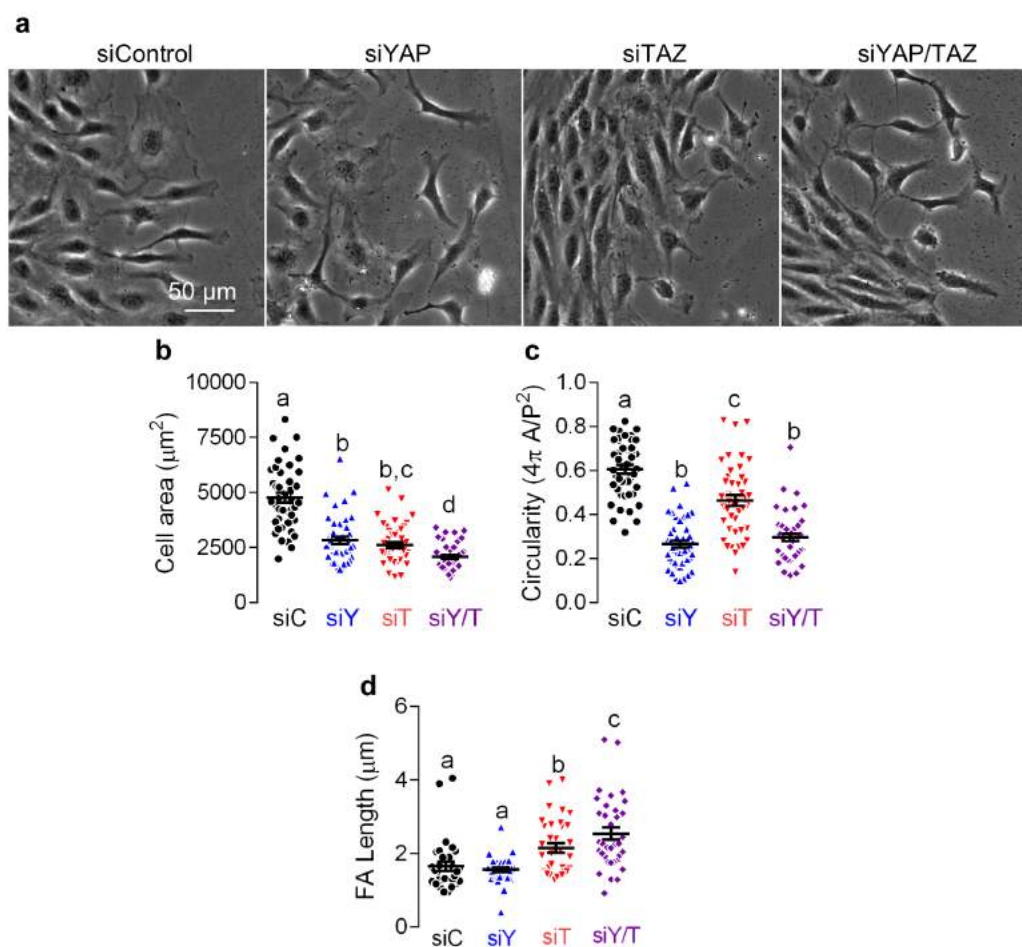

**Extended Data Figure 4: YAP and TAZ control cell morphology, in part through focal adhesion maturation.** Confluent ECFCs were scratched and allowed to migrate for 8 hours then fixed for morphological analysis. **a**, Representative phase images of cell morphology. **b**, Cell area,  $p < 0.004$ , and **c**, circularity,  $p < 0.0001$ ,  $N = 2$  separate experiments, ANOVA with Tukey *post hoc* test. **d**, Average vinculin+ focal adhesion length from data described in Figure 6c,  $N = 3$  independent experiments,  $n > 30$  cells per condition,  $p < 0.007$ , ANOVA with Tukey *post hoc* test. Summary statistics in **b**, **c**, and **d** are represented as mean  $\pm$  s.e.m.



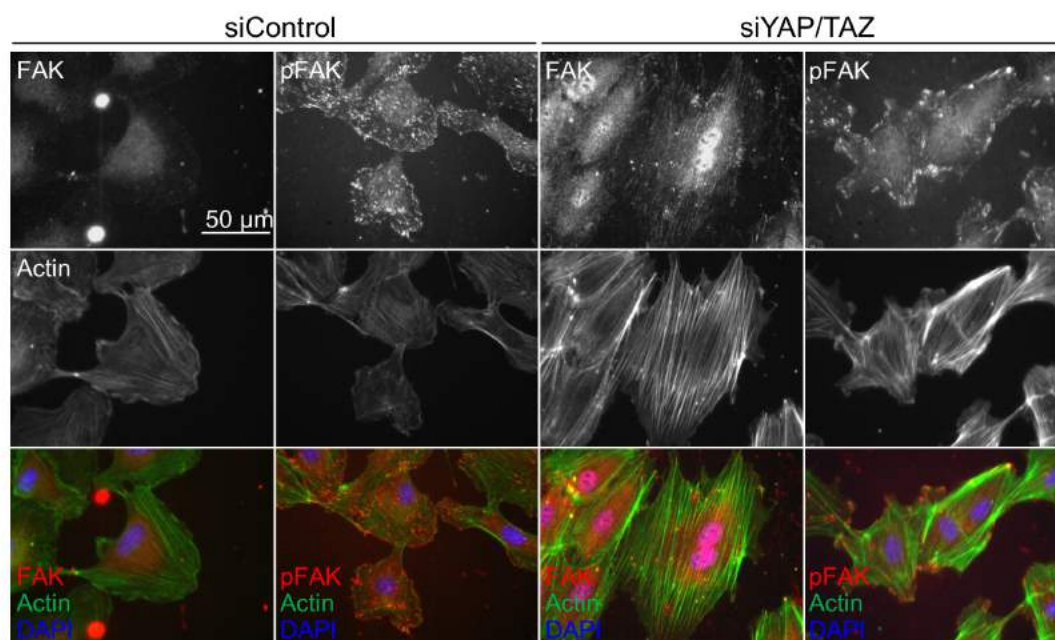

**Extended Data Figure 5: YAP/TAZ-mediated cytoskeletal changes drive changes in FAK and pFAK localization.** Confluent ECFCs were scratched and allowed to migrate for 12 hours then fixed for immunofluorescence. FAK, pFAK, actin, and nuclei were visualized with Alexa Fluor 594-conjugated secondary, Alexa Fluor 488-conjugated phalloidin, and DAPI, respectively.

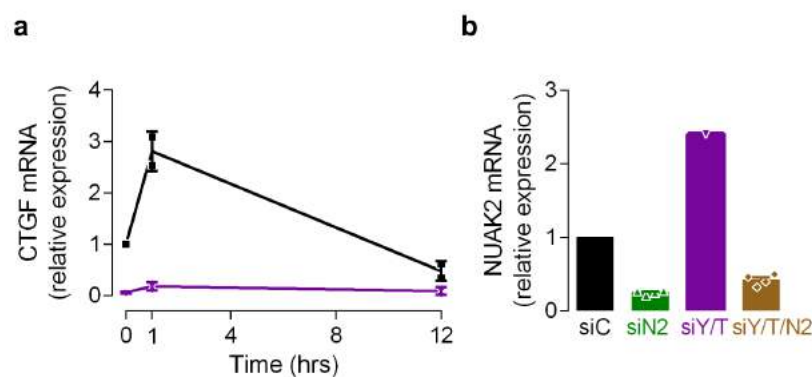

**Extended Data Figure 6: YAP/TAZ depletion decreases CTGF expression while increasing NUAKE2 expression.** Confluent ECFCs were scratched and allowed to migrate for either 0, 1, or 12 hours then lysed and RNA isolated for RT-qPCR. **a**, CTGF expression during migration, N=2 independent experiments, \*  $p < .0005$  vs. 0 hours, #  $p < .0001$  vs. YAP/TAZ depletion, two-way ANOVA with Tukey *post hoc* test. **b**, Confluent ECFCs depleted of YAP/TAZ and/or NUAKE2 were lysed and RNA used for RT-qPCR. Summary statistics are represented as mean  $\pm$  s.e.m.

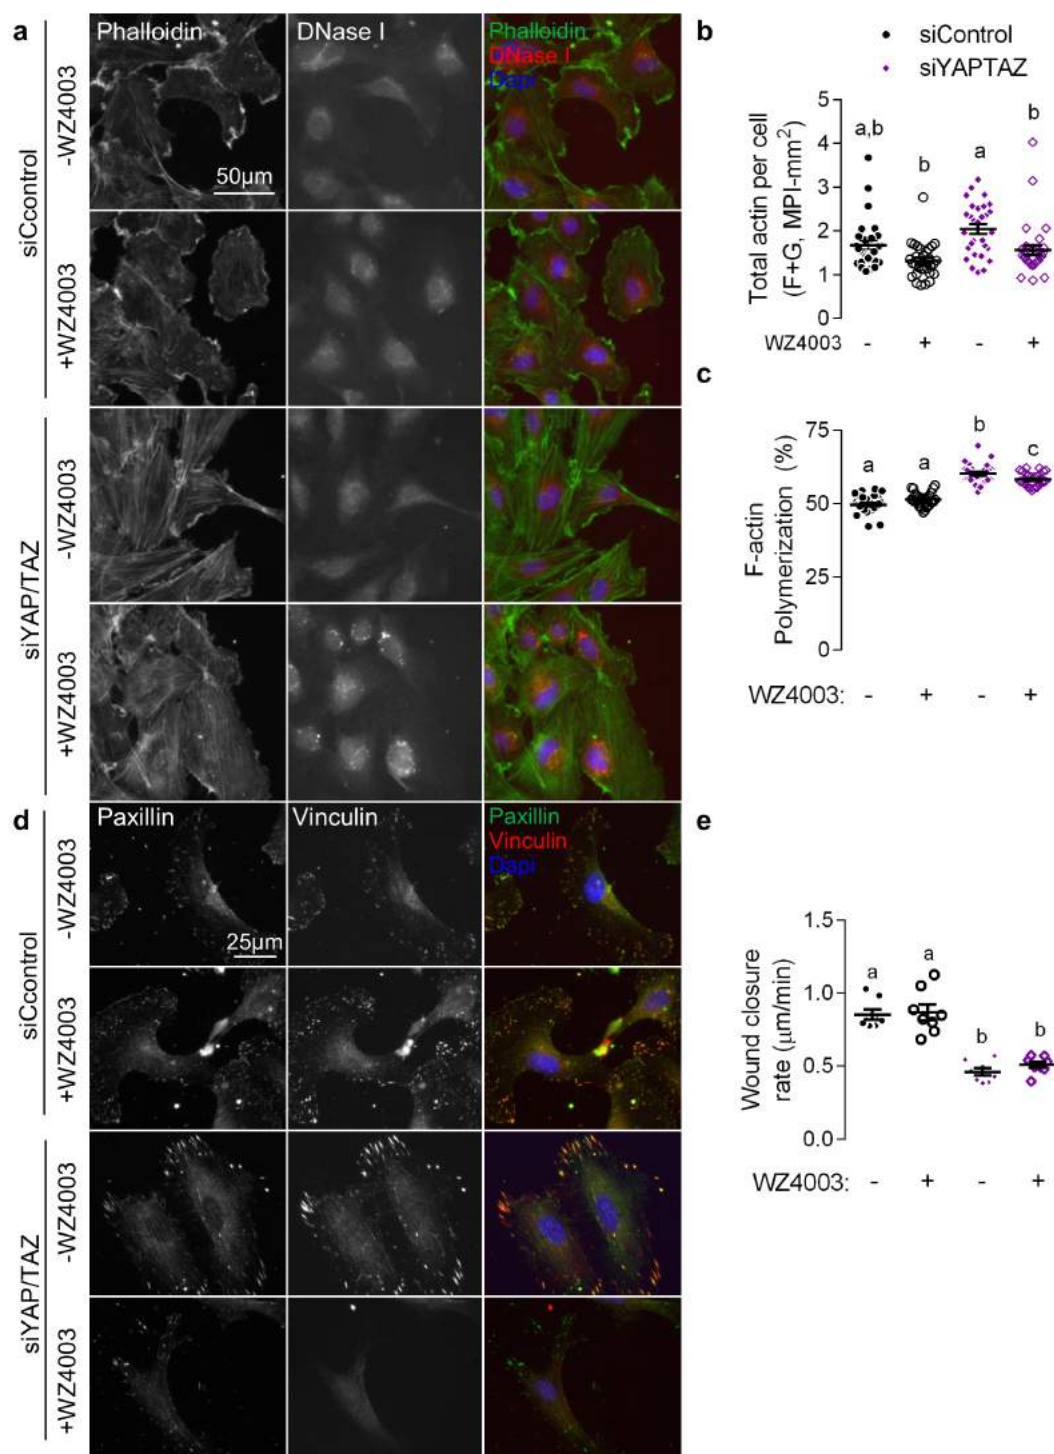

**Extended Data Figure 7: NUAK2 inhibition with WZ4003 partially restores cytoskeletal defects in actin polymerization and focal adhesion morphology, but not migration in YAP/TAZ depleted cells.** Migrating ECFCs were depleted of YAP/TAZ and treated with 3 $\mu$ M WZ4003, the NUAK2 inhibitor, for 8 hours then fixed for immunofluorescence. **a**, Representative images of F- and G- actin visualized with Alexa Fluor 594-conjugated phalloidin and Alexa Fluor 488-conjugated DNase I. **b**, Total actin measured as the sum of F- and G- actin. N = 2 independent experiments, n = 30 cells, p < 0.006, ANOVA with Tukey *post hoc* test. **c**, F-actin polymerization measured as F-actin intensity / total actin x 100%. p < 0.04, ANOVA with Tukey *post hoc* test. **d**, Cells were treated as described above and then triton-extracted concurrent with fixation for immunofluorescence and analysis of structural focal adhesions. Representative images of vinculin and paxillin visualized with 594- and 488-conjugated secondary. **e**, Confluent ECFCs were scratched and imaged over 12 hours and wound closure rate quantified. N = 2 independent experiments, p < 0.0001, ANOVA with Tukey *post hoc* test.

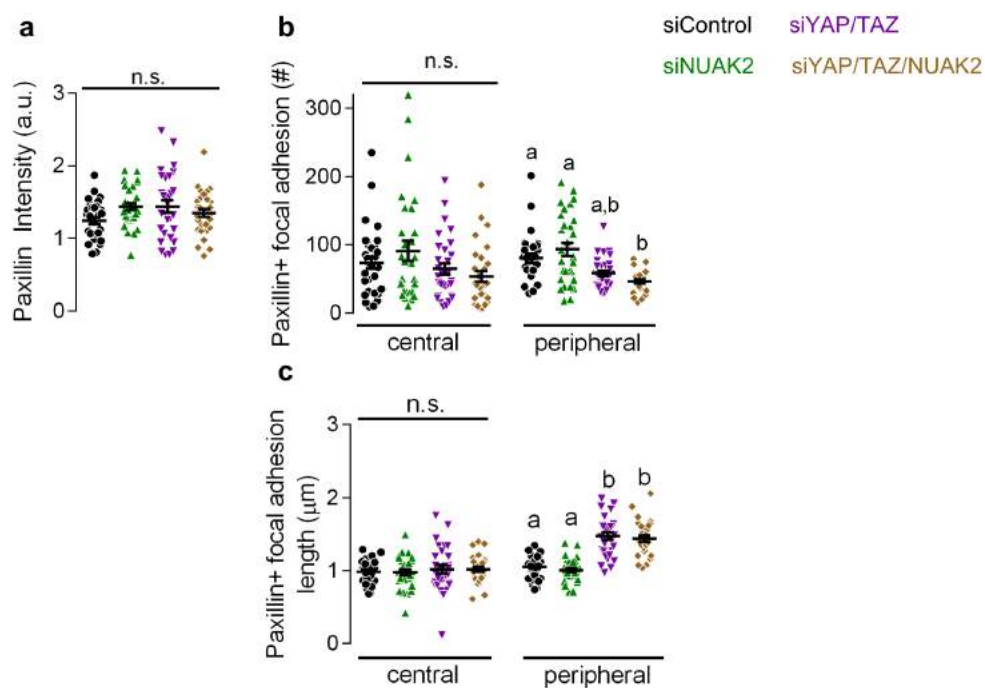

**Figure s8: NUAK2 enhances focal adhesion maturation, but does not significantly affect paxillin incorporation into focal adhesions.** ECFCs depleted of YAP/TAZ and/or NUAK2 were plated on collagen coated glass coverslips for 24 hours then triton-extracted concurrent with fixation for immunofluorescence and analysis of structural focal adhesions. **a**, Whole cell structural paxillin intensity. N = 2 independent experiments, n = 30 cell, p > 0.1, ANOVA with Tukey *post hoc* test. **b**, Individual cell compartments were subdivided into peripheral and central (5  $\mu$ m from the edge of the cell) regions to detect spatial differences in focal adhesion morphology. Focal adhesion length, an indicator of maturation, and number, an indicator of formation, were found in individual cells at both peripheral and central regions. Central (p > 0.08) and peripheral (p < 0.002) paxillin+ focal adhesion number. ANOVA with Tukey *post hoc* test. **c**, Central (p > 0.9) and peripheral (p < 0.0001) paxillin+ focal adhesion length. ANOVA with Tukey *post hoc* test. Summary statistics are represented as mean  $\pm$  s.e.m.

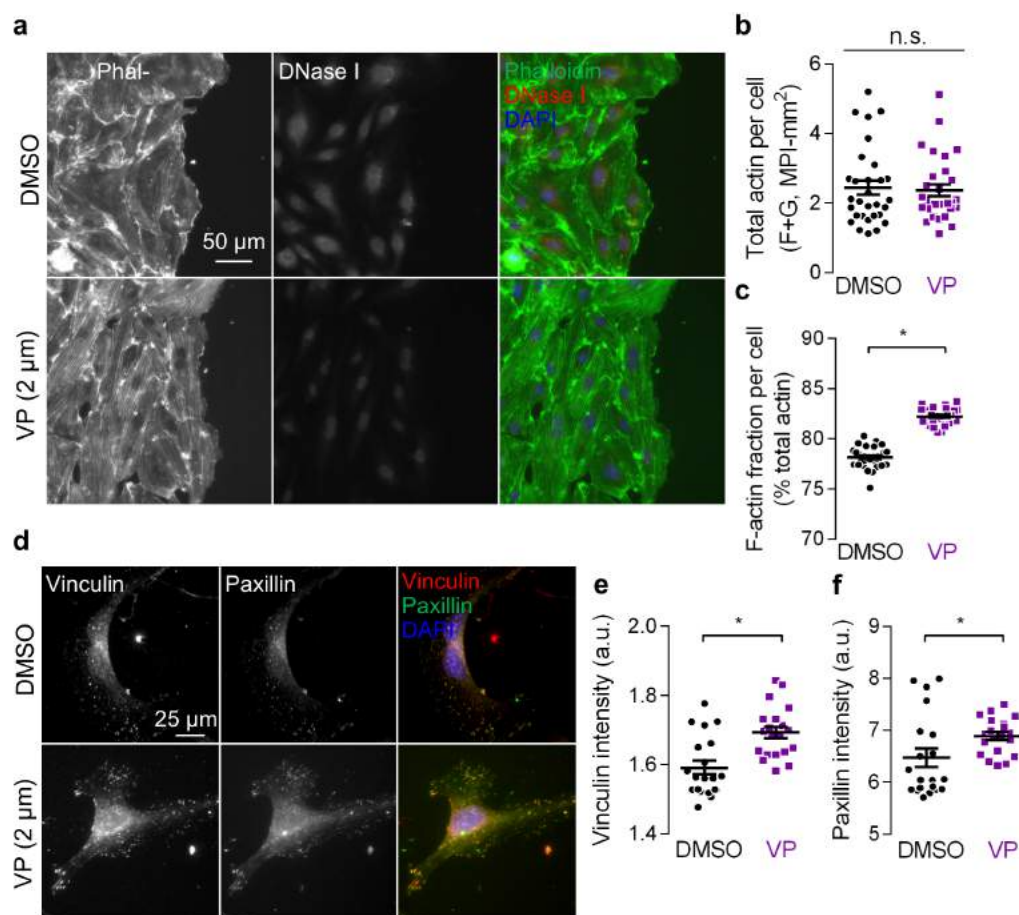

**Extended Data Figure 9: Inhibition of the YAP/TAZ-TEAD interaction with verteporfin phenocopies the cytoskeletal defects observed in YAP and TAZ depleted cells.** Migrating ECFCs were treated with 2  $\mu$ M verteporfin, the YAP/TAZ-TEAD interaction inhibitor, for 8 hours then fixed for immunofluorescence. **a**, Representative images of F- and G- actin visualized with Alexa Fluor 594-conjugated phalloidin and Alexa Fluor 488-conjugated DNase I. **b**, Total actin measured as the sum of F- and G- actin. N = 2 independent experiments, n = 30 cells, p > 0.78, two-tailed Student's unpaired t-test. **c**, F-actin polymerization measured as F-actin intensity / total actin x 100%. p < 0.0001, two-tailed Student's unpaired t-test. **d**, Cells were treated as described above and then triton-extracted concurrent with fixation for immunofluorescence and analysis of structural focal adhesions. Representative images of vinculin and paxillin visualized with 594- and 488-conjugated secondary, respectively. **e,f**, Single cell fluorescence intensity of vinculin (**e**) and paxillin (**f**) incorporation into structural focal adhesions. N = 2, n = 30 cells, p > 0.0009, two-tailed Student's unpaired t-test. Summary statistics are represented as mean  $\pm$  s.e.m.



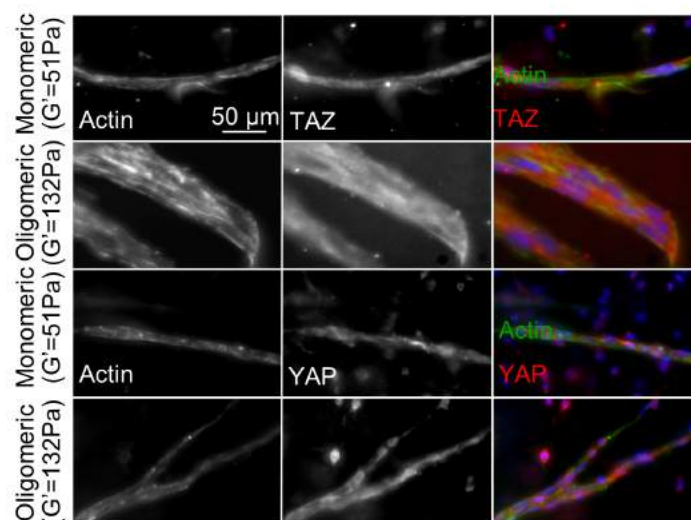

**Figure s10: Oligomeric collagen matrices promote angiogenic sprouting from aortic rings.** Aortic ring explants were embedded in oligomeric ( $G' = 132$  Pa) or monomeric ( $G' = 51$  Pa) collagen matrices. 7 days after explants were embedded whole matrices with explants were fixed for immunofluorescence. Actin and YAP or TAZ were visualized with 488-conjugated phalloidin or 594-conjugated secondary, respectively, nuclei were visualized by DAPI.
